# Supplementary material for: Cuproptosis-related lncRNA SNHG16 as a biomarker for the diagnosis and prognosis of head and neck squamous cell carcinoma
Source: PeerJ. 2023 Oct 12;11:e16197. doi: 10.7717/peerj.16197 (PMC10576967; doi:10.7717/peerj.16197)
Supplement: Supplemental Information 1 [file peerj-11-16197-s001.xlsx]

## Sheet: Table S1
NFE2L2
NLRP3
ATP7B
ATP7A
SLC31A1
FDX1
LIAS
LIPT1
LIPT2
DLD
DLAT
PDHA1
PDHB
MTF1
GLS
CDKN2A
DBT
GCSH
DLST

## Sheet: Table S2
Clinicopathological data of 12 pairs of fresh tissue samples
Characteristic	Cases
	(n=12)
Median age at diagnosis (years)	57(53-61)
Gender
Male	12
Female	0
Histologic grade
I-II	4
III-IV	8
Tumor stage
T1	5
T2-T4	7
Lymph Node stage
N0-N1	9
N2-N3	2
Metastasis
M0	11
M1	1

## Sheet: Table S3
Genes	Forward	Reverse
β-actin	TGGCACCCAGCACAATGAA	CTAAGTCATAGTCCGCCTAGAAGCA
AC090587.1	ACTTGATCTGTCTTGCCTGCT	TGTGACCTTGGACAAGACCTG
SNHG16	TGCCTCAGGAAGTCTCTTGC	ACAGCACTTAACCAAGCCCT
AC012184.3	TGTCGACGACTAGGGTCACT	ATGTGCAAGGTAGGTCGCAA

## Sheet: Table S4
id	futime	fustat	GRHL3-AS1	AC016773.1	AC019171.1	ECE1-AS1	AC007128.2	AL109936.2	DTX2P1-UPK3BP1-PMS2P11	AC010894.1	EP300-AS1	MIR9-3HG	LINC01012	KTN1-AS1	AL162458.1	AC084018.1	AP005136.3	AC010618.2	C5orf66-AS1	AL033527.2	RAB11B-AS1	CDKN2A-DT	AC012184.3	AC011481.1	LINC01089	AC021148.2	AC090587.1	ZEB1-AS1	AC004263.1	AC092115.3	AP000866.1	SNHG16	AL358777.3	AL031282.2	AC024060.2	AF131215.6	AC243965.2
TCGA-CV-7102	0.153425	1	0.0994972	0.283448	0.300534	0	0.180784	0.729705	0.0487942	1.42283	0.486766	0.137504	0.420509	1.23192	0.246347	1.38023	0.159112	0.61504	0.195348	0	2.24932	0	0.391438	0.225645	0.835196	0.406319	1.32654	1.10822	0.239154	0.784755	0.0820213	4.43558	0.0500489	0.590243	0.580145	0.956726	0.064607
TCGA-BA-A6DL	1.70685	0	0.865602	0.280006	0	0.233152	0	0.301002	0.0533894	1.21381	1.81959	1.69162	0.0318186	1.67224	0.651775	2.22986	0.468114	0.988048	3.17789	0.46289	1.49891	0	0.454386	0.638769	2.01482	0.384823	0.652877	1.2667	0.603122	0.886823	0.265317	4.43469	0.834226	0.187261	1.82534	2.11919	0.178492
TCGA-CR-6471	3.29315	1	0.697952	0.0535284	0.436268	0.168514	0.368154	0.113567	0.0840643	0.95017	2.34463	2.41824	0.332851	0.778713	0.328607	0.456806	0.543001	0.158078	5.57569	0	2.59031	1.19812	0.346645	0	0.683382	1.02326	2.36283	0.708938	0	0	0.146655	3.092	0.0436245	0.299479	1.26406	0.482022	0.110764
TCGA-DQ-7592	3.13151	0	0.306962	0.239031	0	0.109294	1.07587	0.475396	0.285816	1.6291	1.41446	0.93191	0.89933	1.41349	0.439995	0.98251	1.1117	0.15095	0.379621	0.375178	1.61499	0.692963	0.193835	0.882369	0.846634	0.470615	1.10802	1.61513	0.104068	0.425352	0.107822	4.62189	0.28629	0.515612	2.02917	0.968939	0.105678
TCGA-UF-A71E	4.12055	1	0.358284	0.677892	0.156008	0.330329	0.260146	0.876016	0.139993	0.611456	0.481299	2.86473	0.540226	0.891497	0.665757	2.80968	0.427606	1.69127	4.65459	0.324465	2.15189	0	0.495797	1.50493	2.8134	0.544584	1.90581	1.3575	0.53097	1.74145	0.54745	3.65345	0.670478	0.250962	2.7526	1.89747	0.154324
TCGA-CV-7416	2.09041	1	1.1169	0.289362	0	0.341075	0	0.469678	0.175173	1.74201	1.84792	0.306262	0.957246	2.28371	0.480782	1.20908	1.13238	0.346985	1.07909	0.0735461	2.19226	1.87161	1.52497	0.603787	0.885574	0.513794	1.3463	1.68657	0	3.20777	0.67084	4.93927	0.0760117	0.541515	1.40359	1.26135	0.483364
TCGA-UF-A71B	4.12603	0	0.256769	0.500394	0.306729	0.368489	0.241352	0.715015	0.508631	2.58578	1.97071	0.595981	0.971001	1.77644	0.221568	1.96931	0.308594	0.240375	1.36888	0.188274	2.01071	0	0.412185	0	1.90485	0.736042	0.840926	1.89585	0.317304	2.22107	0.121281	4.08855	0.365804	0.259423	2.75262	1.69417	0.0873271
TCGA-IQ-A61O	1.15342	1	0	0.391878	0.27274	0.360645	0	0.927062	0	1.40485	0.566377	0.0736832	0.090718	0.690551	0.416407	1.34284	0.0973411	0.96739	0.120219	0	1.99197	0	0.413594	0.685895	1.66107	1.00159	0.7612	2.22067	0	0.318924	0.686523	3.98072	0	0.138683	2.66391	1.18447	0.0769695
TCGA-QK-A8Z7	1.07397	0	1.03689	1.24932	0.177854	0.78668	0.462681	1.04649	0.303342	1.0878	2.21329	2.0994	1.34119	1.4861	1.21045	4.08602	1.57565	1.63594	3.9808	0.945982	3.60925	0	1.17358	2.09136	3.42698	1.49385	1.21051	1.86983	1.01543	1.97262	0.755998	5.03912	1.13659	0.628074	3.41602	2.13898	0.390888
TCGA-BA-4075	0.775342	1	0.22367	0.140124	0.0949116	0.531369	0.702126	0.151079	0	2.14062	1.06998	0.111966	1.30929	2.23481	0.531668	0.702569	1.01892	0.391878	0.226878	0.310456	2.10128	0.120617	0.921969	0.261591	0.653794	0.378623	0.184217	1.53416	0	3.0904	0.899098	4.52937	0.0585243	0.0792928	2.06922	1.14516	0
TCGA-KU-A6H7	1.60548	0	0.84555	1.86249	2.38586	0.569248	0.0871233	2.16206	1.13763	1.94649	2.06041	4.13388	0.141694	0.951066	0.467749	1.59376	0.759497	1.17425	6.0866	0.712067	4.64	2.55985	0.344772	1.3315	2.4044	0.864454	0.345396	1.67347	0.675635	0.181421	0.239398	2.74373	0.427231	0.285994	4.00369	2.74716	0.165944
TCGA-CN-5360	5.94247	0	1.42455	0.945982	0.0908534	0.428786	0.608525	1.30964	0.301002	0.754118	1.94651	2.2664	0.51167	1.47358	0.96857	3.60439	0.607484	0.804301	1.91422	0.364012	2.62459	0.415434	0.208642	1.22113	2.94415	0.654527	3.07483	1.81036	0.266037	0.857424	0.380729	3.98618	0.561008	0.685537	2.16173	2.29875	0.206893
TCGA-CN-A497	2.91781	0	2.39558	0.744936	0.378955	0.663846	0.230449	1.37083	0.472072	0.673376	1.98193	3.52857	0.167229	1.36396	0.954717	3.596	2.42897	1.25054	4.40784	0.483261	2.44874	0.132774	0.344374	1.67667	3.12682	0.733962	2.00353	0.798673	0.767146	1.14124	0.898866	3.94634	1.55797	0.569588	3.38848	1.01714	0.123136
TCGA-CV-7177	1.81644	1	0.591488	0.299948	0.14104	0.0594937	0.870897	0	0.16633	1.78249	0.962956	0.4959	0.132379	0.77273	0.60483	0.250477	0.141956	0	0.926455	0.125254	2.70825	0	1.11603	0	0.772899	0.766214	2.23398	2.62492	0	3.12009	0.413486	3.64205	0.24817	0.173895	1.21244	0.810566	0.405775
TCGA-CR-7386	3.91781	0	0	0.28948	0.103128	0.0848807	0.118227	0	0.0822938	0.371057	1.24434	0.517729	0.0966667	1.21456	0.15043	0.348799	1.03125	0.226509	0.549817	0	1.94167	0.130931	0.288772	0	0.381616	0.162081	1.39638	1.52797	0	0.179001	0.300768	3.49557	0.124593	0.352984	1.61264	0.662205	0.159758
TCGA-HD-8314	1.83562	0	2.44334	1.38206	2.06001	0.0978804	0.578987	2.80426	0.440102	0.929564	2.95062	3.34166	0.111165	0.440208	1.64607	4.4721	0.601697	1.12433	4.90575	1.64062	2.24993	0.730836	0.981049	1.32406	3.71478	0.695103	1.53027	2.72251	0.180657	0.544485	0.45628	3.41015	1.57686	0.495388	3.44487	2.95198	0.49211
TCGA-P3-A6T8	1.09589	0	0.710878	0.528571	0.198494	0.568616	0.887603	0.44297	0.0820213	1.2405	1.01607	1.76392	0.464041	1.20502	1.27668	2.86045	0.455439	1.12763	1.4621	0.176578	2.61344	0	0.654069	0.719928	2.34755	0.870818	1.22027	1.11756	0.298306	1.86029	0.554933	4.22023	0.0941009	0.590722	3.36463	1.00382	0.0415234
TCGA-CN-4725	3.16986	0	1.39977	0.346758	0	0.13606	0	0.177344	0.0564448	1.28363	1.84968	1.90708	0.225768	1.10608	0.779806	2.61525	0.610511	0.352984	1.97247	0.0503276	1.64736	0.270947	0.419107	0	1.90558	0.350045	0.976584	0.622368	0.170438	1.10353	0.123534	4.37866	0.15095	0.191942	1.39769	0.762561	0.193078
TCGA-CV-A461	5.65479	1	0.813607	0.796515	0	0.563353	0.437228	2.13488	0.227002	2.33714	1.50828	2.67873	0.982875	1.94617	1.22453	2.66184	1.68952	1.26885	3.32196	0.464145	2.9612	0.838266	0.825053	0.78115	2.72308	0.77804	2.07015	2.59022	0.654344	1.90246	0.750349	3.13514	0.534958	0.467801	3.38564	2.65826	0.285106
TCGA-CV-7568	2.53973	1	0.243791	0.334683	0	0.16633	0.0803848	1.74114	0.259664	1.72142	1.86517	0.235359	0.713344	2.04946	0.338567	2.35938	0.888383	1.09876	1.45644	0	1.37295	1.14561	1.05047	0.788602	2.08872	0.712552	0.763497	2.09694	0.207768	0.615699	0.328951	4.67717	0.203514	0.53067	3.45851	2.34877	0.305562
TCGA-CV-7430	1.35616	1	0.30871	0.0514417	0	0.0832474	0	0.210514	0.0137838	0.871686	1.08223	1.63399	0.280719	1.32077	0.131853	0.123401	0.572211	0	4.87221	0.0603241	1.57904	0	0.631989	0	0.506094	0.107822	1.5064	1.04124	0	1.35197	0.337654	4.37789	0.0623981	0.09815	2.8484	1.06364	0
TCGA-CN-5363	0.693151	1	0.257735	0.0833836	0.212383	0.0461418	0.242206	0	0.190804	0.703012	0.631896	0.217355	0.026446	2.07355	0.234501	0.664847	0.90912	0	0.136585	0	1.73005	0	0.605779	0	0.648281	0.213005	0.843421	1.2158	0	0.359296	0.356369	4.59463	0.0680516	0.446362	1.892	0.501516	0.129613
TCGA-CV-7236	0.394521	1	0.0939658	0.218595	0.0765591	0.181421	0.249263	0.340049	0.0610158	0.782157	0.588805	0.365581	0.313014	1.05082	0.336855	0.588133	0.286408	0.170181	1.87334	0	2.30305	0.274888	0.29678	0	0.726744	0.28558	0.819505	1.68131	0	0.133958	0.399882	4.77194	0.180021	0.422341	1.63138	1.37907	0.090447
TCGA-CV-6955	0.915068	1	0.222557	0.0943712	0	0.0522768	1.20113	0.197236	0.0381552	0.826599	2.33979	0.412402	0.0448837	0.38416	0.174023	0.873577	0.24062	0	2.85028	0	2.22182	0.0810669	0.281906	0.480886	0.271904	0.19497	2.17718	0.360196	0	0.487486	0.201885	2.90097	0.350045	0.201634	0.567351	1.20157	0.806118
TCGA-UF-A71A	0.235616	1	0.659514	1.01057	0.0506062	0.638398	0.646485	0.404467	0.548535	3.48516	0.941482	0.434455	1.05175	1.74	0.654665	2.4809	1.07803	1.41414	4.15096	0.36586	2.63098	0	0.5474	1.24744	2.89874	0.870582	2.23122	2.2336	0.193267	2.99966	0.702525	4.19836	0.900336	0.367427	3.51778	0.798548	0.760945
TCGA-UF-A7JH	2.45479	0	0.917699	1.2207	0.0777899	0.125387	0.173511	0.926531	0.220206	1.25731	2.07132	0.28155	0.287354	1.2145	0.793854	1.65508	0.475811	0.919073	2.9123	0	2.24723	0	0.614192	0	1.72045	0.617393	0.999856	1.38256	0.229834	1.06198	0.336969	3.82738	0.364124	0.23008	3.45354	0.335255	0.0618453
TCGA-CV-6962	0.345205	1	0.664847	0.23634	0.0831112	0.196229	1.1127	0.567351	0.0335111	2.38629	0.86584	1.18948	1.00899	1.10461	0.960808	1.06702	1.13376	0.184217	1.84828	0	2.63269	0.204391	0.71264	0.230818	1.25066	0.673737	1.13001	1.09464	0.244644	2.55267	0.69332	5.00858	0.722816	0.318114	1.33434	1.82794	1.08794
TCGA-CN-4736	1.08219	1	0.375623	0.396598	0.0844725	0.199248	0.187768	0.834549	0.0999011	0.77905	0.98178	0.241474	0.465191	1.29355	0.533364	2.50419	0.570851	0.635429	0.202888	0.278461	1.79809	0.388796	0.871371	1.15969	1.83062	0.569297	1.06136	1.25381	0.24817	0.280956	0.518132	3.82603	0.0519985	0.645148	1.02198	0.788101	0.0996319
TCGA-D6-6517	0.8	0	0.589955	0.348232	0	0.291132	0	0.289008	0.0882773	1.35716	0.5065	0.328147	0.303459	1.90624	0.43189	1.32895	0.350384	0.143393	0.597412	0	2.62167	0	0.985573	0.484705	1.09741	0.410124	1.24355	0.720016	0.581207	0.857344	0.192194	4.30903	0.272501	0.261471	1.73751	1.16395	0.0257376
TCGA-CQ-A4C6	3.70685	0	0.67708	0.670568	0	0.200504	0.0976108	0.373843	0.100574	0.642286	0.880803	0.485015	0.407516	2.51296	0.403595	1.48161	0.31545	0.876487	0.105678	0.215119	1.41311	0.553066	0.592923	0.916553	1.83151	0.499884	1.72705	1.2087	0	0.981341	0.03492	4.35406	0.151729	0.265317	1.94639	0.499476	0.132248
TCGA-CN-5367	0.964384	1	1.02034	0.392427	0	0.146264	0.163628	0.949423	0.258459	1.24823	1.05901	0.245617	0.410233	2.0161	0.464877	0.823342	0.335941	0	0.257976	0.243669	1.99942	0	0.356707	0.204642	0.899562	0.416407	1.17172	1.39204	0.216982	0.455965	0.102591	3.97817	0.0450235	0.269991	1.78668	0.438399	0.114234
TCGA-CR-6470	4.16712	0	0.762902	0.429429	1.97357	0.945083	0.50019	1.50365	0.461214	1.23622	2.81809	4.43681	0.224164	0.334225	0.341189	2.07851	0.741661	0.305445	3.91543	0.0639171	2.49687	1.83592	0.576861	0.379066	1.61386	0.599603	1.40414	1.37145	0	0.350271	0.284277	3.88467	0.60046	0.566084	2.24266	2.83584	0.191689
TCGA-CV-7429	0.293151	1	0.376957	0.397912	0	0.136323	0.274172	0	0.0676387	2.27307	0.764686	0.0464212	0.552771	1.61136	0.442758	1.35828	0.512379	0.353662	0	0.0750534	1.38006	0	0.483571	0	0.969896	0.473527	0.886511	1.61753	0	2.35084	0.384602	5.01412	0.490981	0.513693	2.08182	1.03344	0.223299
TCGA-CV-7425	4.70685	1	0.730662	0.163885	0	0.0618453	0.578214	0.231064	0.238909	1.04145	0.693855	0.592445	0.263034	1.15348	0.475189	0.990447	0.516519	0.690194	0.55454	0.066537	2.35095	0	0.626392	0.392537	0.830742	0.448584	2.03777	0.509949	0.115433	0.131326	0.0832474	4.0435	0.0687396	0.0931545	1.09936	1.28054	0.0886844
TCGA-CN-6995	0.306849	1	0.179001	0.164014	0	0.15004	0	0.685985	0.264957	1.3531	0.80091	0.559639	0.787432	1.49856	0.549423	1.66644	0.40414	0.167229	0.955164	0.130272	1.41289	1.11617	0.822689	0.20989	1.20145	0.202136	0.974823	1.82684	0.115566	0.967095	0.090718	4.0158	0.0462815	0.0318186	1.10057	1.66052	0
TCGA-CQ-6218	3.43288	0	0.14274	0.171847	0	0.0489336	0.256286	0.0955869	0	1.11676	1.51137	0.235727	0.223546	0.913339	0.136323	0.62742	0.59388	0.1333	1.33994	0.0526941	2.01514	0	0.0709388	0	0.538538	0.225522	1.00985	0.667211	0	0.745711	0.0601858	3.45406	0.0897693	0.0618453	0.92691	0.505891	0.0472592
TCGA-CR-6467	4.86849	0	1.14045	1.30129	0.224411	0.825379	0	2.38173	0.451119	2.20154	2.86817	3.61925	0.259182	0.751549	1.2996	3.67211	1.63287	1.00339	4.41466	0.471344	3.4588	2.23729	0.467488	1.47129	2.98037	0.673195	1.98852	1.89033	0.958954	0.163628	0.504061	3.72342	0.219215	0.71721	4.32708	3.21946	0.0747794
TCGA-CV-6933	7.50959	1	0.480782	0.124593	0.0567222	0.135535	0.636358	0.475707	0.242084	2.15001	1.72901	1.61523	0.599699	1.08148	0.290424	2.01196	0.403486	0.351628	3.88799	0.319271	1.86223	0.207018	0.391438	0.30381	1.96285	0.402395	1.03132	2.09663	0.458907	2.30206	0.206393	3.61657	0.315102	0.468114	1.6515	1.0797	0.545474
TCGA-UF-A719	4.55616	0	1.22002	0.96266	0	0.276199	0.623118	0.992478	0.689836	2.15824	3.41092	2.50691	0.865365	1.25369	0.566572	1.6211	1.64275	1.38598	6.37705	0.802979	1.43941	1.09916	0.356482	0	1.50192	0.178364	1.82175	1.01806	0	1.22484	0.191563	3.69853	1.23622	0.171975	1.92774	0.399882	0.0780633
TCGA-CN-5370	0.709589	1	0.232047	0.0501882	0.249263	0.207268	0.148869	0.467801	0.438506	0.69813	0.904349	0.450485	0.760945	1.28824	0.267955	0.686523	1.12876	0.282736	0.161049	0.0588014	1.53371	0.312665	0.154194	0.186374	0.625083	0.422986	0.812211	1.38521	0.102188	0.945008	0.0994972	4.02254	0.0206267	0.425567	2.00859	0.506196	0.0528332
TCGA-CQ-6221	2.73973	0	0	0.354791	0.0867838	0.0713508	0.514602	1.07546	0.0350608	2.00949	0.515612	0.0567222	0.0614306	0.623305	0.575796	1.3794	0.584	0.191942	0.696884	0.0768327	2.83054	0	0.671927	0	0.986884	0.978196	0.696706	2.03615	0.471031	0.826762	0.278342	3.84378	0.0794293	0.683023	2.27542	2.93132	0.03492
TCGA-CV-7089	5.40274	1	0.237074	0.520447	0.0680516	0.0831112	0	0.631151	0.156785	0.919836	1.87833	0.333996	0.211635	1.31545	0.356707	0.776357	0.662661	0.288772	5.52291	0.0601858	2.42347	0	0.630965	0.190552	0.839476	0.158596	1.5997	0.787432	0	0.331476	0.196859	3.80711	0.160404	0.202261	1.28942	1.21157	0.204892
TCGA-TN-A7HI	1.12877	0	0	2.44422	1.32112	0.4336	0	2.16289	0.260748	1.61937	0.579856	1.15872	0.519944	0.568519	1.09667	1.69586	0.71949	1.56847	6.80194	1.0937	3.45602	1.30165	0.423955	1.62644	4.46486	0.456701	0	0.800496	1.83042	1.26321	0.357383	2.436	0.798258	0.0628125	4.12725	3.69334	0
TCGA-CV-A45Z	4.01644	1	0.721504	0.878372	0	0.281431	0.463622	2.21164	0.434988	2.44002	1.41754	1.85571	0.516519	0.745108	0.737168	3.07121	0.789187	1.56672	5.2347	0.301236	2.98322	0.94718	0.837378	0.82326	2.69185	0.68437	0.942834	2.11936	0.268794	0.434988	0.463099	4.39228	0.465191	0.301471	3.005	1.99978	0.14274
TCGA-CV-5432	10.7671	0	0.80091	0.471656	0	0.396927	0.260869	0.763921	0.288654	2.73816	1.99233	0.897473	0.164271	2.41994	0.60483	1.45696	0.230203	0.259785	3.07526	0.295841	2.04974	0	1.31684	0.587653	1.6053	0.568421	1.69541	0.645333	0.739243	2.70463	0.108491	4.31707	0.177471	0.362778	1.76056	0.491186	0.346872
TCGA-BA-A6DG	0.189041	1	0.273934	0.59321	0.154454	0.187514	0	0.54498	0.196103	0.675093	1.03182	0.0433445	0.276675	1.45581	0.873183	1.80888	0.361095	0.474254	0.098689	0.0702519	1.25924	0.283922	0.383276	0.412077	1.96979	0.931456	0.294547	1.73712	0	0.138552	0.309991	3.78818	0.18612	0.484808	3.18476	1.778	0.152768
TCGA-T3-A92N	0.260274	1	0.494057	0.995014	0	0.52657	0.131458	0.488823	0.135404	1.13855	1.10259	0.777956	0.431142	1.97845	1.42702	3.47035	0.938399	1.62751	1.51904	0.595981	2.16269	0	1.19365	1.29425	3.18927	0.51783	0.413269	2.18701	0.471656	1.92782	0.767231	4.49639	0.295018	0.444985	3.66399	1.88374	0.408386
TCGA-WA-A7H4	1.2137	0	0.754545	1.46184	0	0.184978	0	2.0274	0.733354	1.12194	1.6132	0.763412	0.95442	0.88049	1.28268	3.75973	0.742351	1.83082	3.76121	0.669208	2.6994	0	0.552475	1.20383	3.36594	1.33354	0.920598	1.46843	1.14705	0	0.407298	3.92292	0.625645	0.700795	4.00023	2.22648	0.234133
TCGA-CV-5439	1.49589	1	0.835196	0.475085	0	0.033793	0	0.644502	0.228726	0.753947	1.52065	0.262553	0.390448	1.39616	0.263155	1.31811	1.03351	0.483261	3.57644	0.205518	1.39846	0.1995	0.698041	0.225275	1.74326	0.380175	1.82668	1.0418	0	1.09336	0.268075	3.95661	0.0742314	0.296663	2.03136	0.240986	0.0325241
TCGA-CV-5978	0.589041	1	1.09099	0.617675	0.139862	0.273098	0.160017	0.412185	0.240742	2.21033	1.40409	0.434668	0.335483	1.53336	1.26153	2.30638	0.386701	0.302992	0.594549	0.238542	2.67654	1.62747	0.936214	0	2.24674	0.893751	1.396	3.18169	0	2.72875	1.15931	4.20589	0.283329	0.35061	3.27855	2.21079	1.24385
TCGA-CR-5250	2.18904	0	0.92372	0.347892	1.49457	0.532666	0	1.83167	0.645794	1.08393	4.1311	4.89289	0.136454	0.581978	0.730749	2.6712	0.631337	0.187894	4.79278	0.146655	2.52614	1.76986	0.48419	0.615228	1.81094	0.869398	1.92319	1.93885	0.249506	0.518434	0.444667	4.18601	0.221692	1.08495	2.74401	2.99814	0.193709
TCGA-QK-A652	1.76712	0	0.443819	1.18751	0.068602	0.355016	0	0.396488	0.266157	1.41706	0.837701	0.808426	0.184725	1.18078	1.4508	3.28032	0.794853	1.1564	3.87349	0.330903	2.6223	0.391988	0.635336	0.775514	2.56394	0.475811	1.05158	1.17926	0.295605	1.20308	0.10916	3.47484	0.217975	0.301822	2.72642	1.32516	0.182311
TCGA-CV-6003	4.56164	0	0.556405	1.18085	0	0.0318186	0	0	0.0610158	2.22311	0.588517	1.16819	0.711231	2.79444	0.447844	1.20664	0.950618	0.459746	2.24942	0.253989	1.19812	0.274769	1.41305	0.563939	1.16324	0.385376	1.3995	1.45628	0.327342	2.79292	0.143524	3.69038	0.281906	0.154842	1.26183	0.0406821	0.0306892
TCGA-CN-A49A	1.4411	1	2.51066	0.884715	0.0982848	0.657731	0.921817	0.938625	0.206393	2.15215	2.63589	1.63654	0.759326	2.23545	1.73898	3.44581	0.995738	1.47571	2.50663	0	2.85798	0	1.0092	0.868134	2.74336	0.886979	1.09133	2.40128	0.991826	0.462052	0.78785	4.26754	0.640251	1.25005	3.09405	2.06371	0.257252
TCGA-QK-AA3J	1.27671	0	1.84519	0.519542	0	0.403486	0.313014	2.2237	0.169925	1.65549	2.74565	2.60474	0.679964	1.12651	0.705226	2.9437	1.14841	0.883152	5.53666	0.188021	3.22534	0	1.21444	1.50823	2.6222	0.549916	0.50711	1.67111	1.04544	1.14958	0.444455	3.76117	0.48553	0.717737	3.14781	2.39042	0.0588014
TCGA-CN-4722	4.06301	0	0.682034	0.0856966	0	0.202261	0.848077	0.179766	0.101381	0.719578	1.52947	0.495593	0.0540844	0.824157	0.381837	1.86315	0.269632	0.247806	0.494774	0.051024	1.9805	0	0.166201	0	0.993638	0.592636	1.60654	0.815002	0.172744	0.447949	0.168257	3.83977	0.0699771	0.194465	1.45707	0.354226	0.0230424
TCGA-CR-7390	4.13151	0	1.36154	0.119954	0	0.0989585	0.341075	0.729183	0.156526	3.42911	1.8768	1.73496	0.745194	2.32976	0.425782	1.2558	0.493135	0.734482	2.92456	0.0718999	1.75587	0.199625	0.728922	0	0.484499	0.328032	1.87393	1.42889	0	1.99697	0.151859	5.28343	0.167743	0.268315	1.57434	0.165172	0.0957219
TCGA-CV-7437	1.3863	1	0.522859	0	0	0.133169	1.92193	0.565012	0.144438	2.6899	1.54052	0.0803848	0.0197731	2.0635	0.560128	1.51202	0.617957	0.492007	1.68603	0	2.08216	1.19358	0.613154	0.229711	1.1119	0.925999	1.27441	1.85388	0	3.2197	0.466131	4.21638	0	0.439144	2.18018	0.128029	0.128689
TCGA-CN-5373	4.33973	0	0.661385	0	0.160791	0.100843	0.626205	0	0.0496308	0.390888	2.45778	0.792106	0.287472	1.18479	0.223546	0.984845	0.374733	0.62396	1.12506	0	1.72892	0.2949	0.358509	0.229465	0.834388	0.43808	2.06636	0.927972	0	0.395502	0.131194	3.28159	0.0508847	0.385486	0.912113	0.422125	0.0332292
TCGA-CR-7391	2.50137	0	0.560421	0.239276	0.132511	0.186247	0	0.30381	0.0802483	0.65205	1.07813	0.284633	0.344715	0.712376	0.348912	1.22144	0.36793	0.412727	5.11594	0	2.10269	0.245009	0.157173	0.189919	0.93327	0.345169	1.96018	0.828713	0.292428	0.425674	0.273576	3.40353	0.286526	0.443607	1.79385	1.2087	0.0538064
TCGA-CV-A45T	13.3041	1	0.0858325	0.495388	0	0.449957	0.156397	0.916477	0.0692897	0.783331	0.939678	0.348686	0.573181	1.15588	0.471968	1.24811	0.536053	0.424385	2.60914	0.433814	2.30655	0.967833	0.37529	0.904349	1.70452	0.504468	0.261832	1.03274	0.207518	0.696083	0.183201	2.95895	0.330214	0.155231	2.72829	1.80727	0.109026
TCGA-D6-6826	0.953425	1	1.2509	0.304394	0.0630887	0.370834	0.600079	0.368154	0.213627	1.00288	1.61716	1.47876	0.298893	1.68127	0.781905	2.2875	1.02567	0.387473	1.15898	0.211635	2.10786	0	0.913339	0.177471	1.28054	0.868687	2.40689	1.56457	0.573181	0.309642	0.8222	3.96463	0.235359	0.771463	2.53157	0.972178	0.0253123
TCGA-CR-6493	0.772603	1	0.599603	0.237564	0	0.0688771	0	0	0.0666748	1.07231	1.4086	0.611928	0.952334	1.51425	0.288536	0.52677	0.566182	0	2.15017	0.0740944	2.2841	0.94028	0.747087	0.607579	0.645517	0.163241	0.442227	0.724999	0	0.803392	0.0513025	4.39608	0.149389	0.231064	1.01478	0.555227	0.0336521
TCGA-CX-A4AQ	4.26027	0	0.229465	2.5672	0.27453	0.729531	0.312317	1.5509	0.610133	2.51208	0.403813	2.45843	1.31441	0.803971	1.65237	3.38099	0.707613	2.45731	1.78706	0.799419	3.80968	0	0.940956	2.34721	4.35016	1.58082	0.76562	2.18745	1.93731	0.16954	0.645794	3.70918	0.888617	1.59436	4.25363	3.63172	0.1149
TCGA-CV-6942	11.7315	0	0.207393	0.687777	0	0.358621	0	1.01271	0.184725	0.93327	1.29131	0.511974	0.4959	1.49067	0.660929	2.08345	0.705403	1.10467	0.393855	0.528571	1.53027	0.716332	0.37829	0.631989	1.68226	0.487795	1.32556	0.767655	0.475396	0.92136	0.113967	3.07454	0.131458	0.592636	2.83994	1.08188	0.136323
TCGA-CQ-6228	1.24932	1	0.722379	0.260146	0.0740944	0.202888	1.75223	0.67735	0.17031	3.33775	1.06743	1.82236	1.29496	1.56623	0.516116	2.00547	0.562963	0.682304	4.18263	0.301705	1.57202	0.491186	1.34744	0.206768	1.77551	0.465295	1.86366	2.4083	0.219215	2.10074	0.265677	4.73606	0.67238	0.599127	2.05429	1.30106	0.481092
TCGA-HD-A634	0.356164	1	0.126841	1.81352	3.9913	0.0854247	0	0.885574	0.141956	3.11645	1.02375	1.8538	0.792356	1.40539	0.996678	2.73129	1.27816	1.24403	0.804714	2.10091	3.35866	0.467279	1.89519	1.85431	3.71076	1.05429	0	1.279	0.762476	0.735176	0.956577	4.15955	0.422771	0.439783	5.44928	0.257493	0
TCGA-CV-6950	1.25753	1	0.454071	0.401849	0	0.189413	0	0.572502	0.172999	1.36905	1.1932	0.0779266	0.189287	1.8246	0.567643	2.11137	0.897085	0	3.11641	0.105142	0.865206	0.777704	0.469261	0.586116	1.43701	0.270589	1.65334	1.32158	0.0931545	0.544386	0.119688	4.56674	0.073409	0.381616	1.50136	0.369494	0.0480967
TCGA-CQ-5324	4.36438	0	0.130272	0.229465	0	0.044604	0	0	0.125916	0.59053	0.437441	0.26135	0.363676	0.593306	0.130667	0.510354	0.388024	0	1.03984	0	1.89929	0	0.126576	0	0.555914	0.31742	0.942158	1.46503	0	0.96857	0.328147	4.58634	0.0976108	0.345851	0.987612	0.528071	0.0430645
TCGA-CX-7085	0.879452	0	0.420833	0.27011	0.126312	0.535754	0.0742314	0.200002	0.0514417	0.44615	1.24775	0.289598	0.160533	0.52085	0.346758	1.51536	0	0.275126	3.90571	0.0571383	1.41803	0	0.185105	0.181293	1.02921	0.265437	1.71918	1.1137	0	0	0.187261	3.62244	0.0590783	0.455334	1.30299	0.879549	0.0762854
TCGA-BA-A4II	2.51507	0	0.586308	0.383939	0.081476	0.067088	0.093425	0.461948	0.215616	0.997401	1.77197	0.568227	0.587269	1.4211	0.587557	2.64453	0.494876	0.616546	2.23564	0.206393	2.0826	0	0.571822	1.3384	1.95013	0.662388	0.661567	0.881038	0	1.0256	0.113834	3.09506	0.319155	0.325962	2.51523	0.791356	0
TCGA-CR-7397	2.06575	0	0.415651	0.204391	0.0945063	0.288772	0	0.15043	0.0568609	1.80756	1.26724	0.178237	0.361544	0.977243	0.73933	1.4587	0.347552	0	4.1929	0	2.2909	0	0.490365	0.992406	0.912113	0.723952	1.9437	2.26102	0.396269	0.681134	0.423955	3.7627	0.342441	0.464459	1.52612	0.915942	0.0380147
TCGA-CV-7250	7.94521	1	0.83285	0.361768	0	0.271904	0.595504	0.269991	0.138028	0.940731	1.67582	0.869635	0.559639	1.22361	0.331705	0.86267	0.532367	0.368265	4.24247	0.41738	1.75352	0.217231	0.683652	0	0.829362	0.355693	1.33503	1.26484	0	1.012	0.214	4.86547	0.56774	0.410558	2.26015	0.136979	0.0356239
TCGA-CN-6021	0.756164	1	0.408603	0.162726	0.0746424	0.176833	0.794353	0.229588	0.0739573	1.17709	1.23217	0.214622	0.215865	0.734048	0.699285	1.61254	0.279412	0.314639	3.67457	0.0661236	1.79614	0.422771	0.172488	0.208268	1.58212	0.303693	1.59498	1.07265	0.114634	0.889162	0.201759	4.16166	0.733701	0.179384	1.01521	1.50432	0.417704
TCGA-T2-A6X2	2.70411	0	1.64048	0.613626	0	0	0	0.409364	0.137635	0.950842	0.951066	0.511063	0.581014	1.88022	0.743644	2.35086	0.858538	0.761626	0.171847	0.341986	2.84406	0	0.38084	0.915483	1.42083	0.756169	1.49626	1.12935	0.394624	0.443925	0.327572	4.33938	0	0.484293	2.81639	1.07854	0
TCGA-CQ-5329	5.87123	0	0.289598	0.41997	0.345169	0.19862	0	0.665029	0.0255958	1.70487	1.29725	0.159242	0.590434	3.49651	0.813853	0.873262	0.93138	0	3.37422	0.308827	2.60966	0.658189	1.23131	0.840604	1.37239	0.556012	1.48836	1.89185	0.18954	1.38261	0.558953	4.13935	0.253505	0.759752	2.02928	0.603787	0
TCGA-CN-6019	2.84384	0	0.245496	0	0.104605	0.317651	0.604071	0.45038	0.273337	1.19535	0.761115	0.824564	0.255078	0.888539	0.354903	0.637007	0.613249	0.229711	2.07101	0	2.03221	0	0.292664	0	1.13172	0.625832	1.14084	2.0588	0.303576	1.30749	0.495593	4.1985	0.242694	0.108625	1.89991	1.6814	0.307778
TCGA-CV-A45V	0.0876712	1	0.664483	0.180657	0	0	0.563939	0.972987	0.496922	0.833821	1.95464	0.181929	0.352984	0.754118	0.562181	1.9835	0.308827	0.493852	2.30311	0.143655	2.58046	0	0.437867	0.429536	1.52527	0.607295	1.94505	0.817132	0.127369	0.508834	0.245617	3.45178	0.194591	0.387473	2.37329	1.45439	0.27608
TCGA-CR-6487	0.641096	0	0.895845	0.420725	2.08478	0.682483	0	1.45075	0.305562	1.05894	2.44811	2.27137	0.428142	0.878686	0.254473	2.43146	0.498864	0.556895	4.54296	0.591967	1.74923	1.27608	0.856229	0	1.91414	0.219958	1.79369	1.10842	0.768163	0	0.184978	4.032	0.419539	1.04726	1.75219	1.73292	0.27608
TCGA-CQ-5327	4.54795	0	0.632082	0.416083	0	0.24184	0	0.240009	0.0469799	0.732747	0.471135	0.194465	0.434775	0.82855	0.49917	1.02041	0.69323	0.468531	0.763751	0.478713	2.85987	0	0.340961	0	1.12545	0.237441	1.41927	1.07881	0	0.261471	0.238787	4.82988	0.0947766	0.340733	2.07567	1.01607	0.0622599
TCGA-UF-A7JC	1.49589	1	0.511367	0.930018	0	0.190552	0.136716	0.18916	0.162983	0.750864	1.48182	0.97673	0.804054	1.8222	0.446362	1.4599	0	0.260507	0.282143	0.29678	1.64455	0	0.908352	0.324465	1.64952	0.230203	1.69862	0.886667	0.343237	1.65677	0.120485	4.02319	0.306029	0.19333	1.19541	0.62527	0.494672
TCGA-MZ-A6I9	1.33973	1	0.636265	0.668755	1.72365	0.0962619	0.175684	2.86709	0.379177	1.3544	1.42605	4.46199	0.38084	0.449429	0.917775	2.83139	1.3691	1.34891	7.51076	1.02956	3.20303	2.0352	0.588805	1.40212	3.66493	0.536849	1.23297	1.43568	0.523462	1.58674	0.372841	3.19882	0.424492	0.78576	4.31102	1.62798	0.151859
TCGA-CV-6436	5.20274	0	0	0	0	0.0180644	0	0.63292	0.0347792	0.792606	0.361544	0.146003	0.203264	0.555129	0.111031	0	0.520347	0.886745	4.11517	0	1.84398	0.0558898	0.102725	0	0.395063	0.333195	0.086512	0.44615	0	0.077243	0.196985	1.82952	0.0401209	0.0274372	1.72496	1.28576	0.0174944
TCGA-BA-4074	1.26575	1	0.146395	0.474566	0.282618	0.59827	0	0.0980152	0.0366088	1.44037	1.43301	3.56952	0.755486	2.02906	0.706287	0.909888	0.477263	0.482745	0.346078	0.653702	2.13754	0	0.969454	0.707525	1.27906	0.430178	0.333653	1.99812	0	2.45357	0.0556122	4.91563	0.0920721	0.0257376	2.36829	0.212632	0.0244615
TCGA-CN-6989	2.68493	1	0.666211	0.353323	0.276675	0.282618	0.314755	0	0.335712	1.03323	0.891419	0.443076	1.16092	1.59917	0.457016	2.9692	0.712376	0.978781	3.35105	0.065848	1.81184	0	0.62068	0.388686	2.28202	0.421695	1.11443	1.63724	0.219958	1.86398	0.167101	4.32356	0.274172	0.374845	2.6578	1.71048	0.626112
TCGA-CR-7399	0.49589	0	0.562084	0.520548	0.311968	0.617016	0.531269	1.48738	0.39594	2.06557	1.1551	0.644133	0.358621	1.93165	0.675455	2.21844	1.049	0	3.1959	0	2.30004	0.0866479	1.2372	1.18326	2.1147	0.56988	0.66029	1.1811	0.460376	1.57555	0.184598	4.48063	0.967685	0.742006	3.03974	1.27346	0.0272956
TCGA-CN-5359	1.03288	1	1.68943	0.826274	0.0724489	0.707613	0.72561	0.50457	0.268195	2.81861	1.80773	1.04845	0.691177	1.64768	0.803888	2.52542	0.787767	0.870424	0.403595	0.125651	1.50391	0.179256	1.23683	0.929488	1.65398	1.00978	1.84068	2.41727	0.214747	2.82124	0.518031	4.3555	0.323312	0.648834	2.27977	0.834873	0.759412
TCGA-CV-6953	4.49589	1	0.590913	0.253747	0	0.0593553	0.235605	0.115433	0.0714881	0.802979	0.962068	0.365021	0.116232	1.65205	0.258941	0.360645	0.141825	0	2.61814	0.240131	2.49521	0.337083	0.205893	0.378512	0.531668	0.141302	1.40289	0.506703	0	0.24245	0.0514417	3.93611	0.0443242	0.304044	1.06785	0.787516	0.0289934
TCGA-CR-6481	0.852055	0	0.624148	0.219711	0.761115	0.520246	0.171847	0.307545	0.176961	1.10996	1.59832	2.97247	0.152119	0.445409	0.396817	1.49708	0.372395	0.116232	3.81765	0.0458623	2.23502	1.08814	0.285461	0.146655	0.986375	0.496616	1.77311	0.963548	0.0799754	0.257855	0.208018	3.44124	0.181039	0.165558	1.9313	1.9402	0.119954
TCGA-IQ-A61G	0.986301	0	0.0949116	0.220701	0.0773797	0.154194	0.172488	1.17191	0.0617071	2.07032	0.919226	1.70487	1.37707	1.89445	0.385818	0.139731	0.783247	0.464041	0.97541	0.314058	2.09468	0	0.7589	0.569005	0.564329	0.314058	0	1.19906	0.118758	0.987466	0.14496	3.73799	0.0936954	0.141564	2.38948	0.36614	0.120485
TCGA-BA-4076	1.13699	1	0.556601	0.0672257	0	0.333996	0.286881	0.141825	0.0709388	1.74459	1.3878	0.440527	0.850559	1.0013	1.20539	2.59684	0.923339	0.907737	1.02567	0.153546	1.83054	0	0.579856	1.08161	1.99682	0.268075	0.594357	1.40746	0.136323	1.85188	0.206893	4.25323	0.054779	0.127765	1.60388	0.678342	0.233888
TCGA-BA-6872	1.05205	1	0.432853	0.340163	0	0.158596	0.113434	0.299127	0.171847	2.95231	0.576861	0.675455	0.550211	1.57304	0.233152	0.726482	0.280006	0.859174	0.917088	0	1.19887	0.348232	0.375178	0	0.626392	0.392977	0.191689	1.00619	0.151209	1.00863	0.0803848	4.321	0.0610158	0.253021	1.64261	0.103531	0.0787464
TCGA-CN-4738	1.19452	1	0.742179	0.218595	0.0765591	0.367707	0.170822	1.10548	0.518434	1.00554	2.05318	0.903964	0.399226	1.89472	0.74373	2.91527	0.349931	0.460061	3.14659	0.311154	1.88362	0.356031	0.984626	0.213503	1.96303	0.523763	0.906275	1.84603	0.226385	0.369383	0.193078	4.05858	0.221692	0.668664	2.20589	1.41056	0.331934
TCGA-CN-4727	4.27397	0	0.728748	0.262794	0.262794	0.113434	0	0.282618	0.109962	1.79131	1.34415	3.48374	0	1.23401	0.33754	2.11083	1.227	0.544584	3.08879	0	2.17897	0	0.0563061	0.256769	1.31075	0.430285	0.848478	0.541317	0.271904	1.80513	0.182057	4.17758	0.0852887	0.288654	2.39797	1.69363	0.0740944
TCGA-CN-6997	2.70685	1	0.412294	0.452806	0.0630887	0.469157	0.82603	0.592923	0.19131	1.52997	1.56662	0.393526	0.987248	2.03991	0.522759	2.65088	1.20458	0.597412	2.88405	0.395831	1.41895	0.653885	0.932893	0.725698	2.11989	0.552279	1.22854	2.6396	0.572696	2.91401	1.00137	4.67313	0.480058	0.40621	2.81122	0.27608	0.815411
TCGA-CV-A45W	3.83014	1	1.13855	1.22163	0.156526	0.48419	0.179001	0	0.749749	2.18729	1.70075	1.83463	0.861717	1.27763	0.842939	2.85613	0.299479	1.80694	3.03159	0.934026	2.3894	0.598937	0.810731	1.227	2.47348	0.870187	1.50432	1.67527	0.700173	2.05942	0.484602	3.82291	1.20714	0.663299	2.9286	1.6884	0.397365
TCGA-CN-A63V	1.86027	0	0.200253	0.895458	0.1644	0.0695647	0.273576	0.372061	0.223423	1.28351	0.188401	0.0462815	0.721854	1.09714	0.641546	2.15533	0.790105	1.413	1.89616	0.340847	3.00058	0.107688	0.100574	0.912956	2.01407	0.340847	0.787265	1.13007	0.460585	0.281431	0.430285	4.28036	0.243547	0.512682	2.99424	2.2433	0.0672257
TCGA-MT-A51X	0.663014	0	1.01521	0.180148	0	0	0	0.253505	0.331017	0.767655	2.0505	0.487589	0.528471	1.49774	0.472592	1.20783	0.440527	0	2.48344	0.073409	1.80103	1.24227	0.886823	0.758644	1.59689	0.464355	1.2037	0.570657	0.243913	1.36854	0.0673634	3.02015	0.148088	0.229096	3.05851	0.610795	0.0333701
TCGA-CR-7373	2.43562	0	0.336055	0.524565	0.0747794	0.148999	0.940505	0.229834	0.116764	0.35682	0.576571	0.998845	0.43082	1.26987	0.472904	1.74636	0	0.450063	0.340619	0.129481	1.17785	0.184471	0.39835	0.552377	1.31863	0.328836	1.18783	1.17938	0.221073	0.361095	0.168	4.50744	0.133695	0.261711	1.89798	0.63914	0
TCGA-CR-7394	3.68767	0	0.584866	0.0713508	0	0.352194	0	0.15017	0.0381552	0.531868	1.44186	0.68921	0.191689	0.551787	0.406863	1.16794	0.561595	0.389677	1.92292	0.0835197	1.31075	0	0.165044	0	0.482332	0.250719	1.59932	0.703189	0	0.311387	0.193078	3.4132	0	0.207268	1.45022	0.742265	0.0750534
TCGA-CV-7428	4.57808	1	0.506805	0.278817	0	0.406972	0	1.30918	0.395721	0.982364	1.63329	0.6345	0.278223	1.8677	0.259303	1.17613	1.02169	0.476745	1.4754	0.263996	3.05721	0	0.347325	0.414352	1.03302	0.586981	2.86124	1.146	0.122474	1.44583	0.164271	3.8287	0.0490731	0.499578	1.82883	0.342896	0.0941009
TCGA-CV-A45P	1.75068	0	0.510152	0.151209	0	0.0844725	0	1.0268	0.134089	0.0905825	1.0155	0.271187	0.156914	0.831958	0.292546	0.787098	0.531169	0.293488	4.44218	0.120086	2.12621	0.589092	0.338567	0.517124	0.768163	0.417056	1.47088	0.798258	0.205393	0.609566	0.136454	3.66262	0.104068	0.304394	2.15882	2.16266	0.256044
TCGA-CV-5434	9.07945	1	0.690641	0.356144	0	0.267596	0.895845	1.14594	0.259785	2.46386	1.36815	0.961253	0.648373	1.27334	0.643117	2.77777	0.701593	0.651959	3.32777	0.410992	1.60692	0	1.0036	0.933573	2.27262	0.232415	2.08454	1.88307	0	2.0767	0.663846	4.23805	0.10541	0.375735	2.11267	1.41343	0.817623
TCGA-CV-A6K1	1.87671	0	0	1.61065	0	0.0576929	0.156785	1.19805	0.295135	1.53903	0.546166	0.337311	0.504976	0.546067	0.601506	0.451752	0	0.297015	1.55262	0.480989	3.3423	0	0.123534	0	2.04625	0.565207	0.137241	0.795268	0.828225	0.122739	0.215244	3.33438	0.203765	0.168899	2.98519	1.08583	0
TCGA-CV-5441	7.90685	0	0	0.426104	0.0913952	0.514804	0.538737	2.10306	0.240742	0.82985	1.89616	0.0889557	0.0434845	1.6421	0.68446	1.55252	1.12829	0.808344	0.317304	0.0810669	1.65645	0	0.555718	0.968865	1.62016	0.859493	1.50391	0.422341	0.493442	0.663299	0.118891	4.14454	0.463413	0.701327	2.52529	0.0957219	0.418352
TCGA-CV-7446	2.99452	1	0.921513	0.374622	0	0.112233	2.19219	1.12261	0.304628	2.04646	2.39586	0.833821	1.28262	2.07878	1.23432	2.7737	0.675274	0.539829	2.5121	0.763921	1.01664	0	1.04565	0.470407	2.39048	0.709026	1.12974	2.41762	0.269273	2.98807	0.518535	5.14511	0.913033	0.424922	2.63487	1.77324	0.209516
TCGA-UF-A7JO	1.72877	1	0.26135	1.03316	0.215368	0.337654	0.0866479	0.970191	0.252779	1.47046	1.38527	0.392757	0.550211	1.73387	0.705403	2.75416	0.518233	0.989575	0.620868	0.463727	2.16376	0.35095	0.850159	1.1737	2.2587	0.403922	1.5537	1.64542	0.503756	1.28451	0.16954	3.62367	0.218471	0.264116	3.516	1.47134	0.252173
TCGA-CN-4734	4.63014	0	0.32435	0.157044	0	0.0878701	0	0	0.152378	0.419215	0.305795	0.471031	0.454597	1.1356	0.258097	1.86437	0.0723116	0.160017	0.253384	0	1.29096	0	0.205142	0	0.886589	0.193583	1.74623	0.764431	0.21313	0.241596	0.168385	3.94146	0.065848	0.213254	1.45812	0.214995	0.0848807
TCGA-CR-6492	1.31233	0	0.503756	0.326652	0	0.14274	0.0687396	0.973134	0.105008	0.691445	1.46535	0.630965	0.45038	0.886589	0.815084	2.12486	0.173639	0.830012	4.95036	0	2.4043	0.346758	0.516721	0.695459	1.64205	0.458277	1.43136	0.988776	0.178747	0.539233	0.284633	4.05001	0.706641	0.387583	2.26361	1.81106	0.223299
TCGA-BA-6871	0.29589	1	0.476434	0.718701	0.125122	0.395502	0.747688	0.733354	0.452385	0.676358	1.23952	2.12938	1.44175	1.1396	0.994218	3.7148	1.52115	1.46905	4.89069	0.263034	2.29013	0	0.921969	1.37329	3.18504	0.833578	0.240742	1.50294	0.770449	1.8097	0.281075	4.91764	0.254836	0.602362	3.02997	2.46937	0
TCGA-CV-7247	1.58082	1	0.316146	0.103665	0.200253	0.166073	0.297368	0.853197	0.0961269	1.88233	0.544881	0.49293	0.28759	1.82089	0.151209	0.867817	0.722204	0.155749	2.0606	0.178237	2.07717	0.967538	0.896388	0.660746	0.867659	0.237931	1.84254	1.48145	0.10742	1.47046	0.481402	4.21357	0.18409	0.422879	1.91043	1.32751	0.18574
TCGA-CV-A6JM	0.531507	1	0.35727	0.714224	0	0.188907	0	1.07731	0.1396	2.82536	0	1.66161	0.959993	3.2869	0.163112	0	0	1.36098	3.9389	0	2.85631	0	0.308594	0	1.33794	0.829444	0.424707	1.38935	0.61551	2.86734	0.215368	4.08044	0.0247452	0.146003	1.06723	0.123799	0
TCGA-CV-6959	0.70137	1	0.430713	0.276794	0	0.0809305	0	0.754631	0.0398403	0.639973	0.723864	0.389016	0.642008	1.02857	0.40021	1.40523	0.604451	0.281906	1.66826	0.169284	2.12062	0.0844725	0.643764	0.350497	0.980318	0.338111	1.02567	1.24817	0.197111	0.116099	0.161823	3.97885	0.0406821	0.315334	1.20546	0.777872	0
TCGA-F7-A61S	1.57808	0	0.370499	0.824809	0	0.175812	0	0.174406	0.108892	1.72133	0.242206	0.338909	0.414677	1.05026	0.630312	1.85957	0.967685	0.932137	4.0667	0.355467	2.25036	0.266637	0.773996	0.300299	1.79352	0.652234	0.842054	1.2005	0	0	0.272262	3.40728	0.224905	0.157173	2.3862	1.1394	0.0875986
TCGA-CQ-5331	3.83288	0	0.838589	0.105276	0.0939658	0.220701	0.43189	0.0766959	0.0190614	1.80166	1.43819	0.339251	0.332851	1.28445	0.471864	1.0825	1.10514	0.388245	0.507211	0.0422241	2.20961	0.427821	0.335255	0.373175	0.664028	0.610228	1.59546	0.941031	0	0.505891	0.205142	4.00692	0.0292762	0.447421	2.37016	1.31115	0.092884
TCGA-CN-6018	1.58904	1	0.219587	0.0703893	0	0.113434	0.206143	0	0.127501	1.9641	0.692159	0.184725	0.169412	1.71387	0.489235	1.15691	0.740366	0.205267	0.503043	0.160404	1.83017	0	1.30725	0	0.595217	0.146525	0.617204	1.44932	0.142479	1.75553	0.418352	4.20184	0	0.72334	0.775683	0.672471	0.109695
TCGA-CV-A45U	2.95616	1	1.13953	0.956354	0.354565	0.155879	1.38189	1.16665	0.304277	2.13822	0.568421	1.69977	1.6554	1.88119	1.31644	3.49673	0.880881	1.28641	1.92307	1.03252	2.73626	0	1.19661	1.0135	2.53772	0.740712	0.877744	3.08534	0.62527	2.31504	0.570851	3.61091	0.633757	0.685537	3.43668	1.80062	0.441483
TCGA-MZ-A7D7	1.49863	0	0.65764	0.337197	0	0.193835	0.490262	0.361993	0.0654344	1.88881	1.46347	0.502738	0.202261	1.73574	0.475915	0.898557	1.89122	0.620399	3.0709	0.331476	2.47075	0	0.395173	0.597889	0.865919	0.460271	0.554834	1.43103	0	2.40035	0.299127	3.4668	0.420725	0.14991	2.61549	0.821302	0.187514
TCGA-UF-A718	5.4	0	0.757877	0.544288	0.0716254	0.170053	0	1.05346	0.125387	1.74528	1.97878	0.823423	0.308128	1.1242	0.415542	2.10108	0.547252	0.553459	1.10313	0.0635029	2.3354	0.258217	0.278936	0.200379	1.79061	0.595504	1.652	1.07053	0.212383	1.18377	0.404903	4.05211	0.0867838	0.746399	2.42064	2.16057	0.0846086
TCGA-CV-6956	0.594521	1	0.807272	0.241718	0.0851527	0.136979	0.189287	0.991027	0.0513025	0.643117	0.643302	0.290542	0.889785	1.10252	0.192699	1.5946	1.40724	0	0.105812	0	1.8069	0.108357	0.522458	0.236095	1.33485	0.34301	0.889629	0.735609	0.360645	1.61367	0.0942361	3.82054	0.245131	0.515712	1.94819	0.0890913	0
TCGA-CN-A499	1.96438	0	0.941332	0.898944	1.01243	0.321813	0	1.40741	0.502636	1.05256	1.99183	3.95038	0.816559	1.14359	0.612022	2.93274	1.54176	1.06336	3.00917	0.309758	1.9678	2.07711	1.01035	1.25623	2.21403	0.627046	1.31892	2.14776	0.611739	0.569394	0.158854	4.09603	0.1145	0.658189	3.32021	1.91594	0.0753273
TCGA-BB-8601	1.70959	0	0.964436	0.876095	0	0.0978804	0	1.07963	0.365916	1.75489	1.98899	1.44869	0.623773	1.4715	0.531169	2.52236	1.02503	1.24902	3.30859	0.381394	3.51214	0.730836	0.904118	0.32262	2.4037	0.426426	1.02155	2.32395	0.737427	2.63138	0.535953	4.64104	1.10313	0.146525	2.04037	0.781402	0.831148
TCGA-IQ-A61I	0.00547945	1	0.161952	1.72779	2.23545	0.235727	0.151989	2.5295	0.721854	2.54409	2.29154	4.97149	0.0943712	0.849999	0.434562	0.917852	1.0474	1.34942	7.29556	1.64459	2.52414	1.16098	0.23008	1.42809	1.70168	0.587557	0.471031	1.40425	1.08773	0.228726	0.159242	4.39621	0.304277	0.0705267	3.75055	1.14555	0.0801119
TCGA-CV-7104	1.07671	1	0.301588	0.249021	0	0.0723116	0	0.861082	0.120617	0.582556	0.660472	0.644133	0.355129	1.73205	0.265437	0.857424	0.706906	0.194339	0.633013	0.0779266	1.02354	0	0.379288	0	0.503247	0.588996	1.25375	1.18352	0.134615	0.153157	0.0886844	3.72172	0.0272956	0.12618	0.955982	0.374511	0.0353424
TCGA-BA-A6DI	0.920548	1	0.798839	0.872001	0	0.105008	0	1.18517	0.12618	1.46759	2.20905	0.611456	0.147828	1.31203	0.819178	1.99288	0.503756	0.709555	2.0223	0	2.55768	0.373954	1.05401	0.344601	1.56404	0.434775	1.13849	1.38665	0.100036	1.04935	0.486045	3.23813	0.463936	0.375512	3.00009	1.2353	0.241718
TCGA-F7-A61V	2.07945	0	0.195348	0.653427	0	0.0343566	0	2.2398	0.0816123	0.828388	0.859731	0.912113	0.0196308	0.675003	0.439464	1.97424	1.08678	0.344601	4.25058	0.142479	2.53047	0.202637	0.144699	0.228849	2.41689	0.190931	1.12267	0.56774	0.242572	1.77015	0.214374	3.31027	0.343124	0.257614	2.70644	1.91575	0.0655723
TCGA-CN-4733	4.34521	0	0.231432	0.0982848	0.129745	0.528971	0	0.106214	0.0265876	0.902267	0.816149	0.672652	0.206643	0.732139	0.181166	0.833011	0.512075	0.147958	0.820322	0	1.71229	0.240009	0.225028	0	0.5065	0.42191	1.0914	0.76086	0	0.41738	0.245131	3.21791	0.0204844	0.245861	1.14163	0.692784	0
TCGA-CR-7379	2.83836	0	0.541217	0.21176	0.0740944	0.0308304	0.16543	0.228111	0.0149265	1.65846	0.686164	0.0641931	0.578214	1.25864	0.660107	0.571919	0.510456	0.164786	0.611833	0.128425	1.80888	1.23426	0.130404	0.206893	0.475707	0.14509	1.94546	1.38659	0	2.10118	0.138945	4.32411	0.0230424	0.031254	1.23389	0.320427	0.0297002
TCGA-UF-A7JJ	1.50411	0	0.544485	0.690015	0.375512	0.449218	0.228234	0.786262	0.0623981	2.04963	0.599603	0.736475	0.654069	0.811224	0.748805	2.35533	1.36261	0.423632	0.128425	0.545375	2.52444	0	0.289716	1.06164	1.99375	0.647913	1.13205	1.47985	0.300534	0.947255	0.411752	3.50234	0.154713	0.405557	2.94	1.21735	0.371726
TCGA-CN-5358	0.715068	1	0	0.0513025	0.0680516	0.560715	0.416083	0.394075	0.144569	0.467593	0.640066	0.465609	0.538141	0.857185	0.316262	1.4305	0.133958	0.289126	0.381505	0.118227	1.919	0.389677	0.120086	0	1.09518	0.346645	1.29437	0.945083	0.104739	0.33182	0.33754	3.20047	0.102457	0.49774	1.56711	1.14822	0.0540844
TCGA-CV-5436	1.6	1	0.120219	0.0742314	0	0.119688	0.405557	0.156267	0.134484	2.47342	0.573375	0.314058	0.279768	1.36519	0.383829	0	0.278104	0	2.67347	0	1.23303	0.537743	0.706464	0	0.622743	0.117429	0.645517	1.61367	0.286053	1.81213	0.0894982	4.5904	0	0.303576	0.379621	0.886745	0.115699
TCGA-BB-4217	0.512329	0	0.424815	0.502127	0.127633	1.06936	0.146134	0.869161	0.064607	0.891264	1.59965	1.00619	0.907737	2.03794	0.729357	1.76171	0.803227	0.145612	3.215	0.218347	2.03016	0	0.556307	1.05825	1.91307	0.586212	1.014	2.06626	0.194213	0.657731	0.557582	4.29839	0.242572	0.630592	2.4461	2.09562	0.0771062
TCGA-CN-4731	2.73425	1	0.936139	0.0603241	0.0799754	0.804301	0.336398	0.874049	0.0322419	1.48769	1.91219	1.84587	0.736302	1.2637	0.251204	0.795767	0.426533	0.177344	3.1337	0.323543	1.59889	1.06778	0.690104	0.22231	0.635151	0.349705	0.752577	1.57454	0	1.69381	1.20157	4.1707	0.0492125	0.0990932	0.889318	0.675635	0
TCGA-F7-A623	1.68767	0	0.342441	0.891341	0.406754	0.151989	0.322274	1.16002	0.293959	2.26228	1.64722	0.681314	0.887837	1.23665	1.06185	2.78921	1.4297	1.64081	0.913799	0.468218	2.47558	0	0.540722	0.96547	1.91096	0.477366	1.27143	2.76971	0.11703	1.96525	0.513592	3.16024	0.596935	1.24221	3.20764	1.80925	0
TCGA-CQ-7069	3.49041	0	0.974015	0.370834	0	0.31034	0.153935	0	0.183455	2.034	1.36759	0.263515	0.543001	1.55243	0.836328	2.14643	0.577054	0.291957	0.892818	0	2.89266	0.586404	0.553557	0.362666	1.49718	0.80331	2.2974	1.04886	0.816313	0.606821	0.406646	3.74077	0.123401	0.611833	2.18609	0.140779	0
TCGA-D6-6825	1.34521	0	0.366588	0.337768	0.0821576	0.163499	0	0	0.081476	1.25882	1.1501	0.375735	0.753177	1.98859	0.564232	2.38438	0.868924	0.182184	0.287236	0	1.41153	0	0.316725	0.753605	1.25005	0.277152	1.97706	0.862193	0.126048	0.274053	0.1149	3.89578	0.123401	0.608052	1.90966	0.919531	0.0969365
TCGA-P3-A6SX	3.91781	1	0.815575	0.692427	0.0721744	0.0299829	0	0.737427	0.1129	1.46561	1.41181	0.314755	0.60046	2.62726	0.524164	2.6352	0.141956	0.867817	0.470719	0.347099	1.87696	0.547055	0.0436245	0.808014	2.38529	0.220082	1.15989	1.86378	0.485221	0.543892	0.0870554	4.20584	0.129349	0.675997	2.10168	0.182184	0.0574156
TCGA-CV-7432	7.0411	1	0.599699	0.160275	0	0.0897693	0	0	0.0441843	0.633664	0.883386	0.438506	0.709291	1.49313	0.0727232	0.132774	0.395502	0.16337	0.667938	0.0650208	2.26802	0.739934	0.209391	0.205142	0.279174	0.22367	0.607105	1.20151	0	0.246469	0.0448837	4.58863	0.0227584	0.334111	1.15575	1.17607	0.0583858
TCGA-KU-A6H8	0.89589	1	0.097476	0.0600474	0.0795658	0.0970714	0	2.19887	0.344488	2.19887	1.74739	0.789187	0.245617	0.827494	0.629287	1.85439	0.542506	0.333653	4.23429	0.0703893	2.447	0.101247	0.746915	0.22132	2.0202	0.541019	1.60611	1.35935	0.122076	1.21064	0.560813	3.76649	0.0963968	0.291486	2.45497	1.71734	0.210264
TCGA-CQ-5326	0.243836	1	0.708231	0.107152	0.0723116	0.224411	0	0.585732	0.0434845	0.687329	1.59364	0.402395	0.577731	2.65292	0.123004	0.814591	0.499476	0.160791	0.97475	0.125254	1.34976	0	0.206268	0.20201	0.336398	0.0866479	1.09248	0.936063	0	1.83431	0.135666	4.09264	0	0.502432	0.286408	0.719403	0.0574156
TCGA-DQ-5625	3.10411	1	0.171079	0.0542233	0	0.0877344	0	0.413052	0.152119	1.05478	2.06447	0.601887	0.0340748	1.21909	0.147046	0.461214	0.78157	0	0.173511	0.0635029	2.85693	0	0.350158	0	0.580531	0.38637	1.01593	0.810237	0	0	0.0795658	3.89041	0	0.131589	0.81836	0.40163	0.0569996
TCGA-CV-5977	5.0411	0	0.479024	0.252779	0.0892269	0.0735461	0	0.271904	0.0360461	0.946282	0.372952	0.319734	0.273814	1.96654	0.378512	0.305329	1.51788	0.197362	0.565402	0.0791562	1.83427	1.92029	0.787182	0.246955	0.860526	0.414785	0.173639	0.945158	0.136716	0.15562	0.0367495	4.61407	0.133827	0.196607	2.09599	0.0475384	0
TCGA-CR-7385	2.73151	0	1.9952	0.812786	1.32947	0.319387	0.661294	0.576861	0.879627	1.87307	3.57959	4.37305	0.359634	0.451646	1.49651	2.63564	1.14965	1.25665	5.65196	0.531369	3.06556	1.79044	0.883543	0.669208	2.09562	0.265917	1.59517	1.86734	0.557091	0.238665	0.407081	3.2539	0.691087	0.911423	2.57522	1.98619	0.262313
TCGA-T2-A6X0	0.591781	0	0.692427	1.54102	3.19995	0.218595	0.655993	0.856946	1.00698	1.72552	2.15753	5.37839	0.1133	0.257011	1.18802	3.82606	0.891108	0.849919	5.08596	0.77011	3.11492	0.874128	0.728835	1.29907	3.27278	0.783666	2.56142	2.77511	0.390778	2.04177	0.56472	4.11834	0.314174	0.743989	3.63477	1.70119	0.39605
TCGA-CN-6016	3.95342	0	0.32964	0	0.0968016	0.227002	0	1.08882	0.0583858	1.06956	0.714751	0.335826	0.196607	0.769179	0.416407	1.18941	0.188654	0.398898	2.18989	0	3.01741	0	0.36793	0	1.26333	0.638584	1.97049	1.46697	0	0.168257	0.135009	4.02997	0.11703	0.428786	1.75382	1.039	0.038998
TCGA-F7-7848	3.09863	0	1.88041	0.586597	0	0.269512	0.771379	0.538836	0.248292	0.599318	1.83835	4.02591	0.434988	1.82346	0.541019	2.13613	0.642563	0.173767	4.81922	0.797594	2.00151	0.192825	0.708055	1.09855	2.07217	1.1281	2.04523	1.29178	0.333882	1.84201	0.513794	4.36216	1.16311	1.21487	1.28084	0.952483	0.121811
TCGA-CN-6017	2.33699	1	0	0.177344	0.081476	0.584963	0	0.959473	0.0650208	1.54533	0.488618	0.493647	0.166587	0.993783	0.340391	1.44223	0.159758	0.341417	0.52306	0	1.71541	0.1038	0.670297	0	1.13007	0.356144	1.11443	1.3372	0.125122	0.390778	0.269632	3.36541	0.098689	0.28404	0.69724	0.686792	0.0962619
TCGA-CV-7440	1.84932	1	0	0.0600474	0	0.217355	0	0.352081	0.109294	0.743127	1.124	1.12141	0.128029	1.3083	0.198243	0.504671	0.485118	0	0.278698	0	1.32337	0	0.0480967	0.221444	0.549718	0.241352	0.649202	0.815657	0.122076	1.14672	0.0881416	4.33348	0	0.205768	1.55577	0.699996	0
TCGA-UF-A7JS	1.86301	1	0	0.545672	0	0.0999011	0	0.512682	0.0492125	2.39947	0.490159	1.29608	0.813525	0.882291	0.162339	0	0.234256	0.487486	3.13537	0.388686	3.09053	0	0.607674	0.596649	1.90774	0.357383	0	1.05492	0.347892	2.14923	0.110497	2.99028	0.111031	0.125651	2.9519	1.45654	0.0490731
TCGA-CV-A45R	15.0137	0	0.557189	0.408712	0	0.0936954	0.0880059	0.61551	0.41738	0.656725	1.65278	0.234869	0.371392	0.861638	0.84535	2.1462	0.730749	1.08943	4.48127	0.419431	2.61739	2.54426	0.753519	0.712552	2.48646	0.907967	0.988776	0.816804	0.117695	0.369718	0.107286	3.66715	0.180148	0.528771	2.20711	1.31522	0.0308304
TCGA-MT-A67A	2.50411	0	0.111432	0.664938	0	0	0.104337	0.708496	0.301119	0.679063	1.63441	0.078883	0.146003	0.616828	0.737946	2.00094	0.888617	1.03238	0.85989	0.756426	2.84408	0.222681	0.552967	0.651591	1.94849	0.393197	0	0.931607	0.139208	2.30612	0.161307	2.73014	0.212258	0.130536	3.5833	1.71607	0.107286
TCGA-CV-7414	0.0383562	1	0.853038	0.202637	0	0.454808	0.98943	0.985646	0.0701145	3.43596	1.62817	0.876487	0.331934	0.938248	0.254352	0.455544	0.139077	0.299596	5.21782	0.122739	2.53025	0.472072	0.476226	0.197991	1.19219	0.608525	1.14339	1.65315	0	1.05395	1.01835	3.91696	0.795019	0.370388	1.96418	1.27715	0.0835197
TCGA-CR-7374	0.0821918	0	0.959102	0.878843	0	0.567643	1.31794	0.3639	0.28889	1.92505	2.88626	1.97677	1.45854	1.15445	1.33027	3.81167	0.616734	1.05742	3.11593	0.391658	2.61089	0	1.11257	0.755998	2.8356	0.773068	1.79793	2.00971	0.544485	2.31916	1.1689	4.12862	0.780058	0.699729	2.70865	2.58508	0.8222
TCGA-CN-6013	1.99178	1	1.15814	0.321466	0	0.155231	0.713256	0.783163	0.411318	0.964805	1.48254	0.781234	0.552771	1.14124	0.334225	2.56448	0.152768	0.818851	0.874836	0.134878	1.59779	0.279174	0.517427	0	1.98134	0.289952	2.25671	1.93994	0	0.841168	0.203138	2.97812	0.325847	0.853836	1.41143	1.07396	0.15004
TCGA-QK-A8Z9	1.23014	1	0.551393	0.841893	0.380508	0.127897	0.43082	0.689746	0.124063	2.13314	1.36143	0.424492	0.74028	2.03696	0.733528	2.33345	0.815329	0.429214	0.558366	0.340847	2.32141	0	0.624616	1.34778	2.41143	0.710261	1.41321	2.112	0	0.854155	0.497229	4.29932	0.186374	1.01421	3.27961	1.22977	0.0836559
TCGA-QK-A6VB	1.75616	0	1.50579	1.05561	0.0749164	0.232047	0.316841	1.20038	0.442545	1.90381	2.15254	0.126973	1.54498	1.44324	1.50152	3.38404	1.0513	1.15231	5.05715	0.129745	2.13944	0.808838	0.944259	1.16761	2.94688	0.751978	2.94933	2.52697	0.871528	2.54733	0.1956	4.18477	0.587749	0.235359	3.05083	1.49329	0.528271
TCGA-CR-7382	2.18082	0	0	0.129349	0.523662	0.441908	0	0.266757	0.168514	0.498353	1.20176	0.426748	0.690641	0.799502	0.609566	2.29989	0.462157	0.51662	0	0	2.10849	0	0.335483	0.449746	1.62905	0.586789	2.04681	1.31475	0.474566	1.15491	0.339365	4.45035	0.0801119	0.591584	2.2455	1.90827	0.0695647
TCGA-P3-A5QA	5.97808	0	0	0.293841	0.0843364	0.318114	0	0.666484	0.147307	1.61706	0.762136	0.17645	0.0597706	1.14248	1.07738	1.63835	0.838669	0.871686	0.29443	0.0747794	2.50531	0.946806	0.518535	0.769687	1.61499	0.569102	0.568421	1.34045	0.357833	1.05283	0.234379	3.52008	0.077243	0.406754	2.62084	1.59531	0.0339339
TCGA-CV-5979	3.60274	0	0.850559	0.257373	0.0909889	0.0380147	0	0.276913	0.124857	1.3488	0.679694	0.41186	0.12618	1.62915	0.264596	1.21549	0.478506	0.80521	1.81901	0.229588	2.09468	0.415975	0.4336	0.465609	0.937495	0.304745	1.12048	2.06612	0	1.03231	0.0281448	3.88553	0.187514	0.250355	1.17166	0.184725	0
TCGA-CV-A6JE	2.94521	0	0	1.82505	0	0.230941	0	0.755828	0.116365	1.95509	0.188907	0.364684	0.864889	1.42159	0.736821	0.533264	0.0854247	1.17063	1.41614	0.667302	3.034	1.80166	1.11056	0.915024	1.7845	0.473943	0	1.17543	0.646992	1.44795	0.14274	3.06676	0.413594	0.105008	3.23473	0.28948	0.067501
TCGA-4P-AA8J	0.279452	0	0	1.27011	0.195096	0.341189	0.222681	1.58477	0.119157	2.29819	0	0.651316	0.624616	0.89344	1.72308	2.28579	0.523361	1.31956	2.15264	0.173639	3.58242	0	1.56037	2.20176	3.02215	0.811882	0.195474	2.05946	0.645056	2.39558	0.502636	3.47138	0.313362	0.293724	3.54584	1.35411	0.118891
TCGA-CV-6936	0.454795	1	0.429643	0.27608	0	0.157173	1.17018	1.35975	0.131721	1.25017	1.6906	1.6053	0.777283	1.18973	0.770195	1.78551	0.53087	0.35242	2.27038	0.319965	1.97666	0.0724489	0.657	0.956131	1.34483	0.175045	0.975263	1.05436	0.170053	0.838508	0.123269	4.20774	0.118626	0.332164	1.93881	0.930321	0.131326
TCGA-CR-7393	2.72055	0	0.132774	0.0821576	0.108491	0.291604	0	0	0.0221902	0.94733	1.95936	0.83552	0.219587	1.02673	0.34551	1.37117	0.478506	0	4.75161	0	2.32112	0.137897	0.458382	0.297015	0.747602	0.358734	2.34224	1.28208	0	0.188274	0.574538	3.41629	0.5144	0.295605	1.66512	1.50777	0.0439044
TCGA-CV-7103	4.3589	1	0.732399	0.215119	0.280362	0.362217	0	0.521553	0.131853	2.65714	1.16279	0.448478	0.233275	1.14228	0.657091	2.85513	0.462366	0.453333	5.50012	0.306496	2.32654	0.498557	0.849519	0.393636	2.57202	0.494569	1.19484	2.25354	0	2.90751	0.562084	4.13426	0.590913	0.316377	1.31609	2.072	0.145351
TCGA-CQ-A4CG	1.17808	1	0.224164	0.328262	0	0.29066	0.109026	0.288536	0.266157	1.3384	1.36412	0.169925	0.252416	1.82574	0.489954	1.96077	0.810978	0.833497	0.822118	0	2.06136	0.232415	0.827331	0.483983	1.62728	0.252658	1.84547	2.31829	0.967169	1.49713	0.245739	4.33284	0.115033	0.422125	1.67102	1.21512	0.516923
TCGA-CQ-6220	2.69863	1	0.502534	0.172103	0.0790196	0.127237	0	0.242328	0.0160684	1.5148	0.722816	0.83996	0.438719	1.40119	0.25689	0.872947	0.482022	0	0.769856	0.136716	1.37518	0.36614	1.00748	0.219958	0.875308	0.239642	0.927821	0.860764	0	1.07348	0.125651	3.66451	0.163499	0.289716	1.42471	0.122341	0
TCGA-BA-4078	0.756164	1	2.08899	2.52321	0.178747	0.55395	1.94058	0.584963	0.606916	2.28942	2.57976	3.38484	1.42557	0.946431	1.57245	5.29994	0.339822	1.85774	0.15082	0.432318	3.14277	1.23511	1.27536	1.88792	4.6012	0.709555	1.37067	1.4812	1.51046	0	0.989648	4.76104	0.593497	0.822037	3.82361	2.76757	0.165687
TCGA-BB-4224	0.761644	0	1.46524	2.43592	0.0801119	0.553459	0.337197	2.75523	0.421802	1.03928	3.74447	2.15445	1.30381	1.41408	0.971222	2.09356	1.93233	1.80348	0.948526	1.35778	3.56678	1.57444	1.6564	1.87676	2.93906	0.754973	0.543694	1.40898	1.37901	1.90693	0.339479	3.02274	0.622181	0.388134	4.92682	1.89705	0.345851
TCGA-TN-A7HJ	1.10411	0	0.927972	0.400647	0.0854247	0.232415	0.357496	0.672923	0.148999	1.19396	2.38593	0.337197	0.556307	0.965249	0.639788	2.46011	0.452385	0.189034	3.99732	0.76545	2.76399	0.108625	0.328147	1.27911	1.71154	0.550901	1.15173	0.834954	0.130931	0.407407	0.151599	3.19952	0.436055	0.410992	2.69472	1.56081	0.164143
TCGA-BB-4228	1.53151	0	1.02297	0.520447	3.04822	0.367259	0	1.81114	0.173255	0.819259	3.56746	4.5193	0.063641	1.06274	0.49968	2.36687	0.539531	0.198746	3.15382	0.0797024	2.40365	1.49395	0.972766	1.21269	1.44726	0.869082	0.928048	2.44705	0.263635	0.156785	1.05123	4.30473	0.393526	0.326767	3.09864	1.35174	0.0361868
TCGA-H7-7774	1.11507	0	0.555129	0.118493	0	0.0443242	0	0.579566	0.0844725	0.379954	1.63678	0.396379	0.268554	0.434668	0.148218	0.434241	0.582845	0	3.53937	0	2.24887	0	0.15549	0.152248	0.542902	0.350271	1.53889	0.27274	0.0831112	0.625645	0.167229	3.23654	0.187768	0.352533	0.982437	1.23652	0.275722
TCGA-P3-A5QF	0.90411	1	0.731096	1.16871	1.98979	0.133958	0.42503	2.28167	0.318924	1.64076	2.89819	3.82829	0.0395596	0.572793	0.673918	1.51874	1.35366	0.862908	4.55822	0.60862	2.77899	1.42105	1.07204	1.03083	2.32921	0.539333	0.44074	2.45162	0.127765	0.800827	0.303459	3.52008	0.502229	0.168129	3.85474	2.79749	0.276794
TCGA-CN-5356	3.86027	0	0.421048	0.185613	0.064607	0.129217	0.337882	0.103531	0.218347	1.69417	1.82326	0.22404	1.15776	1.82554	0.397365	0.948377	0.299127	0.144177	0.363676	0.313246	1.3251	0.0822938	0.439464	0.487178	0.747258	0.412185	0.939076	1.26442	0.0993625	0.407733	0.222063	4.80837	0.751207	0.504671	2.62915	0.468948	0.0513025
TCGA-CV-7099	0.665753	1	0.423955	0.272262	0	0.032383	0	0.704783	0.0467006	0.729444	1.88272	0.697685	0.390448	1.19566	0.277866	0.494672	0.475396	0.326882	0.571143	0.197488	2.30644	0.0990932	0.582171	0.404903	0.634222	0.341189	1.35265	1.05353	0.332049	1.42202	0.20989	4.38394	0.0712135	0.244035	1.47301	0.712728	0.259544
TCGA-CR-6472	2.87671	0	0.806613	0.638398	3.51823	0.288063	0.208642	1.98532	0.111298	0.985209	2.09555	2.55043	0.230818	0.376957	0.503043	2.69611	0.493135	0.550605	5.15931	0.619272	3.18171	1.3055	0.447103	0.259905	2.45499	0.435095	0.856946	1.74136	0.144177	0	0.158078	4.40164	1.41386	0.388024	3.41454	1.39358	0
TCGA-CN-4741	6.13425	0	1.77256	1.04208	1.51994	0.269273	0.705049	1.98568	0.50121	0.881195	2.57231	3.96087	0.045443	0.571628	1.2444	2.40308	0.589284	0.606821	4.42156	0.357946	2.68032	1.63427	0.549324	0.950692	2.06698	0.5065	1.7542	0.914258	0.43808	0.491904	0.298658	3.62378	0.256165	0.859652	2.47949	2.67771	0.194213
TCGA-T2-A6WZ	1.32603	1	0.157949	0.577731	0.248049	0.10675	0	1.96196	0.103531	1.89701	0	0.83996	0.178364	1.74183	0.188021	0.230449	0.732139	0.719052	3.7753	0.499986	2.44798	0.567059	0.924556	0.866552	0.781821	0.421048	0	1.09018	0.196733	2.06336	0.10541	2.91422	0.0802483	0.0551957	2.89093	1.21921	0.052555
TCGA-CV-7097	1.05479	1	0.270947	0.115965	0.152768	0.12618	0.330444	0.539531	0.151469	1.92615	0.471968	0.311619	0.654802	1.77391	0.177854	0.946806	1.0481	0.329181	0.097476	0.0694272	1.45101	0	0.341644	0	0.597984	0.418028	0.834388	1.17127	0.23131	1.06729	0.139469	4.3512	0.117695	0.188148	2.37212	0.931683	0.0622599
TCGA-CV-A464	4.71781	0	0.108089	0.773912	0	0.175301	0.101247	1.15724	0.104471	1.84085	0.790021	0.276437	0.557974	2.67728	0.760945	1.63087	0.709555	1.29202	0.706995	0	2.758	0.404794	1.04068	0.635801	1.80058	0.972693	0.914641	1.82257	0	0.926379	0.213254	3.49175	0.132379	0.305912	2.95323	0.920979	0.0354832
TCGA-HD-8224	1.22192	1	1.49165	0.704429	0	0.0607392	1.22064	2.34795	0.29725	1.68522	1.87456	2.79392	1.23229	0.88495	0.698574	2.84768	0.708143	0.784588	5.30412	0.127765	2.89173	1.65718	0.461109	0.690462	1.96196	0.743127	2.32037	1.6164	0.407951	0.95293	0.541614	3.39536	0.0893626	0.726308	2.99146	1.54868	0.367818
TCGA-D6-A6EO	2.07945	0	0.645148	0.5431	0.592541	0.522759	0	1.05151	0.252537	0.955015	2.41743	1.9057	0.0339339	1.41819	0.6054	2.27629	2.07758	0.860844	5.08288	0.393855	2.31904	0.476122	0.382833	0.531768	1.44005	0.362217	1.6955	0.637471	0.635708	2.51374	0.16092	4.00431	1.23958	0.518938	1.71365	0.213876	0.239642
TCGA-BB-A6UM	1.07671	0	0.946731	1.4067	1.67884	0.0621217	0	2.93176	0.625645	1.88503	2.45078	4.45583	0.0878701	0.379177	0.887603	2.34048	1.53212	0.990011	6.5343	0.413486	3.99211	2.32089	0.901108	0.957915	2.3822	0.738292	1.19617	1.92243	0.73907	1.63571	0.819341	3.29216	0.354001	0.44074	3.8851	2.99181	0.0302654
TCGA-CN-5361	5.80822	1	0.125651	0.288299	0.372841	0.125122	1.28989	0.781402	0.402286	2.37443	1.52321	0.523863	0.633943	1.53147	0.775177	1.32043	0.375067	0	0.636172	0.406537	0.958286	0	1.13172	1.32763	1.23683	0.823342	1.30889	1.70434	0	1.36648	0.290896	3.79605	0.182438	0.468114	1.81639	0.94703	0.196355
TCGA-CR-7372	2.07945	0	0.0988238	0.229465	0	0.190552	0	0.356257	0.125783	1.33171	2.27819	0.939678	0.111833	1.30655	0.688136	1.11563	0.300299	0.480989	3.19125	0	1.93908	0.528471	0.894915	0	0.80653	0.890174	1.77315	1.20445	0	2.13179	0.238665	3.58447	0.0250288	0.178109	1.7894	0.445303	0.0640551
TCGA-QK-A6II	0.778082	1	0.207893	0.461424	0	0.0486547	0	0.267955	0.0119249	0.528371	0.1333	0.100709	0.338453	0.946132	0.0939658	0	0.224781	0.657091	2.58111	0	1.99429	0.0754642	0.17031	0.166715	1.08672	0.506094	0.116232	0.474566	0.0911243	0.377179	0.0539454	3.66016	0	0.024887	0.44159	0.671656	0.0237521
TCGA-F7-A624	1.03562	0	0	0.974162	0.118626	0.376735	0.0695647	0.0970714	0.0243197	1.75557	0.136323	0.439676	0.176706	1.31603	0.333195	1.27775	0.863859	0.66948	0	0.463099	2.21472	0.411426	0.329411	0.322851	1.93606	0.229096	0	1.68001	0.263395	0.297954	0.153935	4.30519	0.319734	0.236707	3.20905	0.743558	0.139731
TCGA-BB-4223	8.82466	0	1.99653	0.981049	2.7656	0.742869	0.484602	1.82032	0.444031	1.49999	2.67834	4.25994	0.42664	1.08107	1.15795	3.85054	1.40915	1.9193	3.17393	1.20132	3.31272	1.41479	0.552082	1.82065	3.32899	0.790522	2.55021	2.82963	1.05568	0.207143	0.531968	4.37881	0.861876	1.19912	3.8772	2.98178	0.227864
TCGA-HD-7831	1.8274	0	0.277033	0.0900404	0.330444	0.0980152	0	0.188274	0.0243197	0.748118	1.25574	1.62049	0.0843364	0.962956	0.792606	0.560911	0.517931	0.479127	0.895225	0.10541	1.74476	0.731705	0.7376	0	0.839476	0.499068	1.34903	1.97578	0	0.385265	0.165172	4.08717	0.0735461	0.321697	2.10484	1.23248	0.139862
TCGA-CV-A6JO	0.539726	1	0.506196	0.328262	0.0797024	0.128293	0	0	0.12446	1.08699	0.837782	0.182565	0.309176	1.429	0.207268	1.17505	0.801655	0.176833	2.91535	0.0705267	2.17865	0.196229	0.458067	0.221692	0.787098	0.296193	1.24208	1.13481	0.339479	0.684998	0.149259	3.76065	0.208767	0.249627	1.67125	0.777872	0.0321008
TCGA-CV-7263	1.53425	1	0.71079	0.276318	0	0.182057	0	1.74975	0.268554	1.34959	3.02779	1.62138	0.0467006	0.847997	0.820485	1.66243	0.603692	0.281431	0.612588	0	2.91795	0.567156	1.06681	0.86671	1.26484	0.778713	1.89782	1.77087	0	1.62873	0.483364	4.37687	0.263155	0.637935	1.81044	1.29366	0.222805
TCGA-CN-6992	2.92055	0	1.48223	0.481919	0.121811	0.239276	1.01142	0.894527	0.155102	1.62938	1.27822	2.68527	1.03626	0.947928	1.06723	3.74907	0.846714	0.68428	3.48684	1.81918	2.14447	0.294077	1.02013	0.826437	2.86239	0.741575	1.86738	1.6859	0.631337	2.73528	0.331247	4.49819	1.16871	0.308244	2.75393	0.453755	0.431249
TCGA-CV-6939	1.82466	1	0.372952	0.343806	0.78031	0.52677	0.869556	1.55714	0.89933	1.45223	2.82353	2.57928	0.188781	0.945683	0.529771	1.5786	0.97306	0.185613	4.2346	0.0742314	2.71609	1.99708	1.07649	0.608525	1.21045	0.720629	1.6025	1.31504	0	0.400538	0.446044	4.48156	0.611739	0.470303	3.05052	2.81129	0
TCGA-CV-5431	1.43014	1	0.354903	0.226015	0	0.615699	0.983678	0.545178	0.0786098	2.26466	1.68728	0.397584	0.522257	1.00576	0.355806	1.1714	0.701239	0.721416	0.941482	0.262553	1.3789	0.100978	0.491391	0.732399	1.09849	0.24062	0.647361	0.83875	0.338111	1.00597	0.14104	3.65358	0.141825	0.397584	1.96347	1.41132	0.0318186
TCGA-QK-A6IJ	1.06027	0	0.0862403	0.98061	0	0.243547	0	1.29842	0.224287	1.12823	0.75873	0.901108	0.218347	0.76137	0.720891	0	0.680774	1.24793	6.54938	0.69332	3.31936	0.596744	0.648373	1.29872	2.50627	0.506602	0	0.678703	0.62686	1.04852	0.0709388	2.42828	0.92372	0.272143	2.6633	1.19055	0
TCGA-QK-AA3K	0.693151	0	0	1.00834	1.59608	0.161307	0.289362	0.555325	0.0803848	2.72148	0.289952	3.06588	0.943809	1.58198	1.6854	2.5366	0.368489	1.46952	0.883464	0	2.45636	0.168129	0.942834	1.70244	2.7885	0.587557	0.659103	2.13721	1.13777	1.13947	0.220825	4.87925	0.526269	0.401084	4.22582	0.771632	0.105946
TCGA-UF-A7JV	0.246575	1	0.331934	1.66093	0.0736832	0.330558	0	0.117961	0.0443242	0.87208	1.55479	0.233152	1.18568	0.690641	0.325156	0.903732	1.00187	0.311154	2.7748	0	1.98867	0	0.358621	0.545968	0.993711	0.372395	0.608998	1.53938	0.113167	0.24732	0.270708	3.98257	0.110764	0.335255	2.62157	0.931305	0.1149
TCGA-UP-A6WW	1.41918	0	0.799419	2.19109	2.98645	1.74975	0	2.27062	1.26321	2.64178	2.39706	5.41587	0.133827	1.04942	1.01585	2.4861	0.406319	0.885887	4.63386	1.279	2.85635	1.91999	0.382723	1.72067	3.02056	1.45518	1.07731	1.85858	0.443076	0.991535	0.371503	2.9649	0.50782	0.537246	4.08645	3.37747	0.14991
TCGA-C9-A47Z	0.523288	1	0.5431	0.837863	0	0.139077	0.0992279	0.263876	0.21313	0.860129	1.51359	0.246955	0.590243	1.60113	0.903655	2.76871	0.320427	1.27369	0.389016	0.149389	2.09498	0.636636	0.601506	0.624803	2.18631	0.290542	1.07984	0.773574	0.365804	0.411969	0.145351	3.56479	0.104605	0.509747	2.65097	1.04865	0.257373
TCGA-CQ-6224	4.71507	0	0.086512	0.20201	0.137766	0.0861044	0	0.650397	0.0561673	0.788519	0.429964	0.996316	0	1.04907	0.375623	1.01235	0.727267	0.54587	0	0	1.32763	0.658463	0.201383	0.197236	0.942308	0.802235	1.48882	1.68059	0	0	0.371169	3.79576	0.260989	0.285343	2.07454	0.773237	0.0560285
TCGA-CV-6433	1.75616	0	1.08141	1.01278	1.96647	0.587653	0	3.78752	0.633106	1.96362	3.62633	4.71604	0.164658	0.792272	0.310107	1.94987	1.94953	0.672108	4.47312	0.155879	3.33504	2.93238	0.917852	0.959918	1.5357	0.91219	0.332278	3.27742	0.488104	1.44843	0.364124	2.81363	0.772815	0.633106	3.41552	4.1571	0.0363275
TCGA-CR-6482	0.945205	0	0.498864	0.479955	2.3272	0.666847	0.470927	1.47897	0.215616	1.09532	2.03386	3.29804	0.251204	0.870345	0.313362	1.7961	0.973134	0.286408	3.47599	0.172103	2.1114	0.796265	0.263395	0.188907	1.06219	0.656268	1.49631	0.976877	0.37629	1.13396	0.471448	3.34126	0.159112	0.365581	1.55724	1.18853	0.105142
TCGA-DQ-7588	1.16986	1	0.603312	0.183074	0	0.135535	0	0.910119	0.222681	1.23223	0.980098	0.559541	0.70726	1.81238	0.190678	0.736388	0.787683	0	0.461109	0	1.46341	0	0.897937	0.233765	1.0212	0.520447	0	0.594357	0	1.83758	0.0600474	4.54599	0.220082	0.0874628	1.88721	0.733007	0.0339339
TCGA-CR-6480	0.991781	0	1.10084	0.495081	0.862987	0.237319	0	1.37646	0.712288	1.19975	3.18153	5.3794	0.0718999	0.668755	0.610322	2.17862	0.525668	0.32262	4.58761	0.067914	3.08403	1.87247	0.834954	0.213752	1.76532	0.838911	2.30384	1.52667	0.226509	0.256648	0.543496	2.81547	0.242328	0.70982	1.83475	2.33219	0.090447
TCGA-QK-A6IG	0.608219	1	0	1.15969	0.108892	0.0455828	0	0.327227	0.0221902	1.46383	0.445833	0.139469	1.13159	1.05735	0.828063	1.66444	1.17766	1.28635	0.135141	0.428571	2.40458	0.487692	0.599984	2.07348	2.12575	0.394514	0.210389	1.29707	0.315102	0.984334	0.120352	4.03929	0.415867	0.176706	3.86471	0.764261	0.0440443
TCGA-IQ-A61H	3.11781	0	1.0268	0.795684	0	0.298189	0.31313	1.37523	0.0395596	2.14503	0.97944	1.67545	0.914565	1.03499	1.10628	2.24863	1.13711	1.90119	0.610511	0.31904	2.2944	0	0.588037	1.28398	2.0969	0.563841	1.49861	2.26168	0.14952	2.80754	0.414352	3.31739	0.57628	0.385155	3.06025	1.50457	0.850879
TCGA-CV-A45Q	14.1151	1	0	0	0	0.105678	0	0	0.138945	0.742782	0	0.0705267	0.283211	1.23769	0.331247	0.118493	0	0.615699	0.606726	0.408821	2.18856	0	0	1.31742	0.89933	0.200253	0	0.719753	0	0	0.0267293	3.13399	0.0792928	0	0.842456	1.72683	0
TCGA-D6-6515	1.10411	1	0.371949	0.487795	0.0835197	0.34301	0	0.255319	0.19131	1.01628	1.40735	0.517124	0.54587	1.62607	0.421264	1.72705	0.505891	0.629753	2.92022	0	2.09305	0.385044	0.321466	0.231801	1.3352	0.51662	1.85886	1.3217	0.128029	0.145743	0.116764	3.92232	0.026021	0.416407	2.15046	1.56978	0.305212
TCGA-F7-A622	0.983562	1	0.562084	0.785843	0	0.283803	0.0781999	0.702569	0.0805212	1.44387	0.416407	0.10165	0.383829	1.43781	0.35682	0.919302	0.789938	1.07601	0.682304	0.636079	2.97809	0	0.398022	0.770702	1.1832	0.207893	0.569199	1.51687	0.293488	1.19642	0.101785	3.69234	0.451646	0.214871	2.20533	0.204015	0.0540844
TCGA-CV-6943	1.64932	1	0.295958	0.115033	0.102725	0.446468	0	0.238665	0.111699	0.70779	1.01678	0.524365	0.341986	0.537644	0.317883	1.36014	0.531868	0.326767	5.14931	0	2.3542	0.250234	0.364124	0.147958	0.795518	0.324004	1.87275	1.3184	0	0.178492	0.195852	3.31491	0.0941009	0.298893	1.71717	1.05915	0.081885
TCGA-CV-7407	2.96164	1	0.327342	0.301354	0	0.11703	0.618709	0.666211	0.304861	1.6378	0.56267	0.689657	0.765535	1.47171	0.378512	0.737254	0.699107	0.559639	0.601411	0.125783	1.98921	0.261471	0.127765	0.202888	0.893285	0.344033	0.869714	1.84691	0.311736	1.91146	0.156655	3.6811	0.445303	0.188401	1.95177	0.463518	0.192573
TCGA-CN-6988	0.871233	0	2.32803	0.813525	0.0647449	0.537246	0	0.977903	0.184598	0.886277	2.13576	2.80366	0.254836	1.15769	1.5144	2.47946	1.68634	0.706995	5.73075	0.721241	3.0306	1.55778	0.867106	1.1432	1.84048	0.914182	1.76209	0.994218	0.0996319	1.8885	1.12274	5.0098	0.505383	0.341758	3.71911	1.45059	0.539829
TCGA-BA-A6DD	0.473973	1	0	0.346305	0.0727232	0.117163	0	0.417704	0.0999011	1.19906	0.441696	0.509848	0.312317	1.03977	0.441377	0.56267	0.604261	0.161694	3.89258	0.064331	2.6523	0.261711	0.638306	0.203138	0.993058	0.296428	0.786429	1.36899	0.111699	0.546857	0.0589399	3.18061	0.249627	0.0754642	2.72973	1.15004	0.0578315
TCGA-CV-7415	1.90411	1	0.153676	0.0485152	0	0.1038	0.505993	0.859254	0.0385767	1.84225	0.961549	0.452912	0.905736	1.85396	0.395611	0.667847	0.350724	0.143524	1.01949	0.0568609	2.14156	0	1.11902	0.847596	0.754374	0.286171	1.45122	2.89319	0	0.791856	0.287827	3.51024	0.0588014	0.350158	0.663846	1.11796	0.148088
TCGA-CN-5366	0.986301	1	0	0.322044	0.131326	0.108357	0	0	0.327572	1.73387	0.731444	0.181039	0.329066	3.27119	0.430392	0.611267	0.517528	0	0.376624	0.224287	1.90346	0.983897	0.702126	0	0.850719	0.385044	0.653152	1.46394	0.199625	1.43253	0.170053	5.01259	0.120352	0.708231	1.64989	1.05235	0.225892
TCGA-CV-7101	0.438356	1	0.411643	0.093425	0.0629506	0.307312	0.0723116	0.446044	0.145482	1.49835	1.28859	0.893052	0.10165	1.17249	0.220949	1.04998	0.489646	0.140648	2.85955	0.055751	1.64099	0.297368	0.457962	0.476537	0.780898	0.237564	1.432	1.50075	0	0.967021	0.319271	3.57363	0.251204	0.115699	1.10044	0.786596	0.578987
TCGA-CQ-6225	1.10411	1	1.4401	0.296193	0	0.169155	1.07094	1.22639	0.239642	2.95615	2.23597	2.88943	0.981341	1.71721	0.703189	2.07217	1.12413	0.58323	2.89056	0.54587	2.11453	1.32406	0.788352	1.26099	1.8102	0.639232	1.20452	1.37334	0.182946	2.21375	0.493237	4.04141	0.624803	0.345623	2.77509	0.628727	0.310573
TCGA-BA-5558	5.46575	0	0.636729	0.336055	0	0.0578315	0.299127	0	0.0560285	0.547647	0.943884	0.356707	0.382723	1.56769	0.289834	0.942984	0.264476	0.156655	0.701327	0.0622599	2.30033	0.0896337	0	0.524565	0.820649	0.239398	1.32308	0.616358	0	0.699552	0.0071955	4.16671	0.0852887	0.195977	0.714487	0.143785	0.0282862
TCGA-CV-5971	1.92055	0	0	0.135009	0.68724	0.514299	0	1.09288	0.130931	1.86655	0.380951	0.981122	0.0856966	0.61664	0.611928	1.51137	0.610228	0.263155	2.65448	0	2.02357	0.588133	0.746743	0	1.24495	0.523462	1.41116	1.55739	0	0.552377	0.607674	4.25139	0.0563061	0.45586	2.2122	0.672833	0.229342
TCGA-BA-A6DJ	1.11507	1	0.08882	0.471135	0	0.171847	0	0	0.0576929	1.23842	0.874128	0.0703893	0.392977	0.535157	0.426426	1.5367	0.390668	0.670025	0	0.348006	2.03724	0	0.281787	0.680324	1.21164	0.271067	0.600175	0.815985	0	0.633292	0.215616	3.31781	0.1503	0.342213	2.21179	0.744161	0.0855606
TCGA-CV-7095	1.56712	1	0.4959	0.321235	0	0.18409	0.385928	0.405012	0.0920721	2.47628	0.942608	0.573568	0.128689	1.65379	0.167872	0.316725	0.416516	0	4.38607	0	1.61608	0.328836	0.354452	0	0.610606	0.565987	1.22188	0.891264	0.142217	0.439251	0.23217	3.68053	0.057277	0.115033	0.774671	0.188401	0.0739573
TCGA-D6-6824	0.210959	0	0.347325	0.16877	0.0775165	0.581978	0.172744	1.52707	0.219091	1.6035	1.18561	0.544485	0.0901759	1.4453	0.529571	1.15192	0.353549	0.325732	1.33354	0.068602	2.40141	0.191057	0.611739	0.569588	1.18193	0.413702	1.869	1.40299	0.228726	0.577248	0.633664	4.04126	0.505891	0.632734	2.25502	1.71585	0.0913952
TCGA-CN-6010	4.1726	0	1.03259	0.633199	0.154454	0.454386	0.176706	1.45644	0.181929	1.31725	1.56496	0.38405	0.0560285	1.60985	0.911193	2.77446	0.70115	1.02701	2.33196	0.377846	2.44345	0.592254	0.910042	0.869082	2.34684	0.824727	2.09889	2.68367	0.435202	2.59457	0.75745	4.11902	0.584193	0.645241	2.13172	2.35572	0.680954
TCGA-P3-A5Q5	2.49315	0	1.13396	1.31655	1.62742	0.346305	0	2.51589	0.692695	0.621243	1.33971	3.86741	0.192825	0.981999	0.456175	3.28545	1.15788	1.19346	4.39551	1.26003	3.04663	1.53426	0.279055	1.69435	3.29541	0.363339	0.385597	1.14581	0.308128	1	0.121015	3.1069	0.489132	0.409798	4.35764	2.7596	0.164658
TCGA-D6-A6EK	2.39726	0	0	0.596172	0	0.0607392	0	0.889551	0.0873271	0.570366	0.313246	0.359858	0.102457	0.751121	0.233029	0.661111	0.212258	0.164143	1.60312	0.0652966	2.77587	0	0.286645	0.386259	1.43477	0.224658	0.144307	0.331591	0	0.247563	0.0302654	2.83327	0.110898	0.0311128	1.69768	1.73942	0
TCGA-BA-A4IG	2.34247	0	0.950319	0.924024	1.81521	0.207518	0	0.596076	0.66612	1.93599	4.0881	2.82885	0.0825664	1.28848	0.49057	1.68212	1.40507	0.784839	5.69282	1.00065	2.80387	1.80941	1.09112	0.796515	1.59837	0.463832	1.46817	1.77766	0.667665	0.925012	0.164529	3.71565	0.106616	0.737946	3.45445	1.45948	0.320773
TCGA-CR-7368	3.41096	0	2.08038	0.986666	1.53381	0.414244	0.832201	1.11975	0.619929	1.13192	3.12386	4.03225	0.640899	0.71914	1.00741	2.54411	0.710261	1.09741	4.68084	0.213378	2.66894	0.856548	0.49057	0.944184	1.95736	0.367147	2.02673	1.19137	0.434562	0.488001	0.258217	4.22625	0.114367	0.838508	1.10949	1.88663	0.0751903
TCGA-P3-A6SW	3.06849	0	1.12373	1.33868	2.41489	0.421371	0.102322	2.44657	0.625832	0.880568	1.30585	3.95994	0.441058	0.637564	0.662844	2.92361	1.06378	1.30024	4.88238	0.88276	2.42369	1.64418	0.0539454	2.18314	3.0914	0.268554	0.467801	1.48285	0.843099	0.295488	0.166458	3.69397	0.473112	0.638213	4.01067	2.6581	0.105142
TCGA-BA-6873	0.334247	0	0.330214	0.476019	0.143002	0.0603241	0	0	0.0867838	1.1624	0	0.0942361	0.851439	1.69537	0.660016	0.972472	1.36401	0.309525	1.03182	0	2.17731	0.181039	0.642748	0.686881	0.930321	0.702746	0.876173	1.32826	0.217107	1.41868	0.237441	4.56031	0.28948	0.38228	2.61469	0.285225	0.114234
TCGA-CQ-A4C9	1.93699	0	1.12181	0.526069	0	0.4755	0	1.53923	0.507516	1.60075	2.64466	2.98112	0.349818	1.25351	0.965249	2.71178	2.00971	0.589859	4.90397	0.829525	2.54194	0	0.38648	0.716859	2.50261	0.843823	1.61231	1.43563	0	1.68885	0.171079	3.85653	0.316957	0.817541	2.76568	1.29942	0.041243
TCGA-CN-6011	2.55616	0	1.35935	0.267835	0	0.052555	0.702303	0.527871	0.147697	0.877901	1.72434	0.911346	0.710173	0.868687	1.3553	1.66707	0.542308	0	0.648742	0.214249	1.49667	0	0.283329	0.339365	1.36485	0.447738	0.787934	1.68109	0.509544	0.57056	0.16221	4.08974	0.254957	0.763327	0.827982	1.79564	0
TCGA-CQ-5325	1.79178	1	0.258217	0.237319	0	0.17645	0.242694	0.331361	0.0881416	0.394624	0.243182	0.506196	0.152508	1.37446	0.198368	1.46483	0.214125	0	0	0	1.99128	0.140124	0.464982	0.301471	0.686344	0.364012	1.28268	1.24434	0	0.360083	0.184471	3.29375	0.0681893	0.41186	1.82688	0.459327	0.044604
TCGA-CN-A49C	1.76712	0	1.25755	1.07909	1.41229	0	0.184978	1.88729	0.497434	1.71	2.31516	4.96223	0.169797	0.601697	0.928124	2.33728	1.01114	0.494364	6.96226	0.505078	3.01815	1.81258	0.712904	0.760774	2.40792	0.514703	0.673104	1.51111	0.719841	0.709379	0.430392	3.115	1.08447	0.480058	3.44553	3.08194	0.0661236
TCGA-DQ-7591	1.70411	0	1.15685	1.37962	2.33871	1.13442	0.798092	1.8257	0.721854	2.0027	2.3542	4.49523	0.359521	1.02056	1.11849	2.45133	1.68796	1.91789	3.91573	1.46483	2.34982	1.29965	0.855511	1.80707	2.41435	0.893207	1.77627	1.15497	1.15049	1.18276	0.340277	4.52136	1.08929	0.972472	3.20461	2.60343	0.153935
TCGA-BA-A6DE	1.20548	0	1.35135	0.409364	0.219091	0.939603	0.395282	1.47337	0.345964	2.2921	1.25695	1.17089	0.86259	1.77096	0.697952	1.38692	1.37651	0.461109	1.64316	0.133037	2.7854	0	0.782241	0.847837	0.942834	0.651316	1.77003	1.12532	0	2.07687	0.313826	4.08538	0.159112	0.853756	1.92805	0.981707	0.256528
TCGA-CV-6937	1.70959	1	0.373286	0.729705	0.712288	0.0912598	0.870187	1.02652	0.171847	2.01956	0.942533	0.341417	0.804384	1.51556	1.71796	1.38984	0.111432	0.631803	2.60829	0.276675	2.3454	0	0.894837	1.83495	1.40697	0.59684	1.3779	2.41175	0	2.14277	0.513086	3.02639	0.256286	0.776862	2.72879	1.74114	0.211261
TCGA-CN-5369	0.00273973	1	0.282736	0.610133	0	0.193709	0.265797	0.439676	0.165687	1.25683	1.21276	0.381948	0.496002	0.842939	0.541812	1.77804	0.339137	0.38084	2.06599	0.158596	1.38012	0	0.395063	0.469886	1.16633	0.416299	0.975924	0.870187	0.0953168	0.555325	0.229957	4.15847	0.128953	0.458277	2.09832	0.71721	0.0247452
TCGA-CN-6024	0.923288	1	0.396708	0.612777	0.0896337	0.0738202	0.10286	0.502636	0.156267	1.71638	1.02687	0.563451	0.31034	1.45238	0.607484	1.34454	1.02375	0.527871	0.643856	0.226385	2.1177	0.497229	0.852718	0.248049	1.3454	0.207268	1.41733	2.94847	0	1.81447	0.309991	4.66734	0.554736	0.214125	1.24562	0.343806	0.438293
TCGA-CV-6934	0.178082	1	0.0727232	0.0880059	0.274649	0.249627	0.133169	0.806943	0.104068	1.55469	1.11303	0.587461	0.613154	1.49738	0.484808	1.69844	0.464668	0.132643	2.7499	0.103128	2.21403	0.810155	0.562474	0.452174	1.32843	0.436695	0.944484	2.03058	0.0912598	0.676719	0.311968	4.07565	0.123534	0.364909	1.95196	1.84595	0.0471195
TCGA-F7-8298	2.72603	0	0	0.851359	0	0.767655	0	0.606537	0.351967	0.772055	1.16279	0.478817	0.983969	1.46394	0.369383	1.36944	0.898092	1.15756	0.488515	0.360645	2.04775	0	0.715103	1.36087	1.17671	0.472384	0.717737	2.10906	0.415759	0.252537	0.119821	4.2275	0.297015	0.813935	2.48143	0.292664	0.059909
TCGA-BA-5152	3.52877	0	0.0571383	0.0691522	0.135009	0.129349	0.0533894	0.145743	0.046002	0.864255	0.682304	0.18612	0.156655	0.58323	0.123004	0.3122	0.892352	0	3.4376	0	1.89507	0.704518	0.134747	0.252658	0.416191	0.532467	0.783331	0.901417	0.0717627	0.663117	0.118891	3.99235	0.083792	0.267835	2.1232	0.118758	0.0549179
TCGA-CR-7377	0.764384	1	0.250355	0	0.206143	0.299479	0.373175	0.41446	0.0146409	0.856946	0.670568	0.401303	0.36446	1.94849	0.188274	0.888227	0.599889	0.304628	3.13136	0	1.63469	0	0.205643	0	0.644133	0.219587	0.780982	1.73344	0	0.449324	0.494262	3.8111	0.169668	0.173511	1.2102	1.12532	0.057277
TCGA-CV-A460	5.03562	1	1.01099	1.09727	0.0885487	0.65104	0.595408	0.598556	0.154324	1.00202	1.74006	0.502738	0.670931	0.47228	0.508733	2.47457	0.327572	0.661111	2.21658	0.22367	2.02326	0.572793	0.250234	1.07799	2.4546	0.753605	0.816477	1.58904	0.259664	0.154324	0.276199	4.66548	0.132774	0.39605	3.1455	1.33737	0
TCGA-CX-7082	0.030137	1	1.31121	0.653702	0	0.417164	0.862432	0.982218	0.29537	2.62945	1.53207	0.945008	0.50711	0.744161	1.1865	3.14739	0.867343	0.70186	4.69432	0.311503	2.75155	0.824075	0.543199	1.28517	2.64602	0.502127	1.56993	2.30056	0.594644	1.55944	0.487898	4.60533	0.534958	0.198494	2.82124	2.06247	0.450908
TCGA-CN-A63U	2.6411	0	1.7956	1.13888	0.0802483	0.748204	0	2.54493	0.281669	1.60412	0.842858	3.3081	0.77349	0.66102	0.566961	3.68211	2.1562	1.36564	4.28539	0.77197	3.38743	0.19774	0.630405	1.81217	3.80488	0.869556	0.156655	0.267236	0.849919	0.494057	0.559737	3.73765	1.62863	0	4.13086	0.880019	0.0322419
TCGA-KU-A66T	1.51233	0	1.18669	0.955536	0	0.290424	0.323197	1.04369	0.0758749	2.44792	1.39819	1.11756	0.889941	1.85412	0.475707	1.89305	1.31034	0.906891	1.15562	0.742524	1.76026	0	0.859572	0.845109	1.37095	0.285225	0.408494	1.28078	0.226015	1.81779	0.143393	4.52269	0.261832	0.481506	2.55795	0.118626	0.0903115
TCGA-CV-7252	0.413699	1	0.0959919	0.0590783	0.152638	0	0.0899049	0	0.0315364	0.599699	1.4878	0.373063	0.0553345	1.33617	0.397693	0.599223	0.535257	0.328951	0.097476	0.0694272	2.48187	0.363227	0.519944	0	0.664028	0.441696	0.833821	1.33668	0.120219	0.376846	0.473735	4.55942	0.0482362	0.287354	1.28149	1.24775	0.0924781
TCGA-QK-A8ZA	1.01644	1	1.92532	0.866394	0.101919	0.309991	0.66948	0.873498	0.399554	2.78484	1.75146	1.84748	1.29531	2.7736	0.455229	3.24946	0.796265	0	2.90835	0.403813	2.30553	0	0.649937	0.279768	2.65352	0.338339	1.3856	2.33411	0.296193	2.47719	0.406101	4.56779	0.181039	0.712728	2.92014	0.157173	0.945383
TCGA-HD-A4C1	0.030137	0	0.808673	0.185359	0.165815	0	0	0.481196	0.195222	0.914258	1.5709	0.603692	0.56988	1.45244	0.50019	1.3644	0.515309	0.505484	0.46634	0.147437	2.51869	0	0.906737	1.04914	1.25447	0.227987	1.62077	0.900336	0.250719	0.816149	0.485324	4.02189	0.152248	0.424385	1.84988	1.66548	0.254231
TCGA-CN-6994	3.2411	0	1.05005	0.306496	0	0.215989	0.62826	1.19011	0.492212	2.30958	1.29772	1.40724	1.01057	3.07461	1.63134	2.30235	0.308361	1.29213	2.66375	0.188148	2.03527	0	0.510759	0.759071	1.91161	0.396927	1.81942	1.58823	0.452701	2.95515	0.183201	4.26562	0.100439	0.837863	1.33222	0.768248	0.0873271
TCGA-CR-6473	3.08219	0	1.44922	1.39868	0.699107	0.399554	0	1.59732	0.127897	2.41162	1.88803	5.25117	0.72779	1.06736	0.17031	3.13248	0.210264	0.778713	4.2302	0.498659	2.47412	1.99996	0.355918	1.60966	2.017	0.42664	2.94768	0.40021	0.313594	0.637935	0.351063	4.76175	0.583519	0.906891	2.22191	1.85408	0.167615
TCGA-CV-7255	0.175342	1	0.96997	0.126973	0	0	0.066537	0.413919	0.0231844	1.12955	0.462681	1.38753	0.722903	1.08644	0.158854	0.38084	0.656725	0.129481	1.42814	0.0511633	2.14988	0.451435	0.315798	0	0.70248	0.512884	1.64672	1.23499	0.172999	0.728312	0.184344	4.7654	0.104068	0.594835	0.688941	0.659103	0.0683269

## Sheet: Table S5
id	futime	fustat	GRHL3-AS1	ECE1-AS1	AC007128.2	AC010894.1	EP300-AS1	LINC01012	AL162458.1	AP005136.3	AL033527.2	CDKN2A-DT	AC012184.3	AC011481.1	AC021148.2	AC090587.1	ZEB1-AS1	AP000866.1	SNHG16	AL358777.3	AL031282.2	AC243965.2
TCGA-CV-7102	0.153425	1	0.0994972	0	0.180784	1.42283	0.486766	0.420509	0.246347	0.159112	0	0	0.391438	0.225645	0.406319	1.32654	1.10822	0.0820213	4.43558	0.0500489	0.590243	0.064607
TCGA-BA-A6DL	1.70685	0	0.865602	0.233152	0	1.21381	1.81959	0.0318186	0.651775	0.468114	0.46289	0	0.454386	0.638769	0.384823	0.652877	1.2667	0.265317	4.43469	0.834226	0.187261	0.178492
TCGA-CR-6471	3.29315	1	0.697952	0.168514	0.368154	0.95017	2.34463	0.332851	0.328607	0.543001	0	1.19812	0.346645	0	1.02326	2.36283	0.708938	0.146655	3.092	0.0436245	0.299479	0.110764
TCGA-DQ-7592	3.13151	0	0.306962	0.109294	1.07587	1.6291	1.41446	0.89933	0.439995	1.1117	0.375178	0.692963	0.193835	0.882369	0.470615	1.10802	1.61513	0.107822	4.62189	0.28629	0.515612	0.105678
TCGA-UF-A71E	4.12055	1	0.358284	0.330329	0.260146	0.611456	0.481299	0.540226	0.665757	0.427606	0.324465	0	0.495797	1.50493	0.544584	1.90581	1.3575	0.54745	3.65345	0.670478	0.250962	0.154324
TCGA-CV-7416	2.09041	1	1.1169	0.341075	0	1.74201	1.84792	0.957246	0.480782	1.13238	0.0735461	1.87161	1.52497	0.603787	0.513794	1.3463	1.68657	0.67084	4.93927	0.0760117	0.541515	0.483364
TCGA-UF-A71B	4.12603	0	0.256769	0.368489	0.241352	2.58578	1.97071	0.971001	0.221568	0.308594	0.188274	0	0.412185	0	0.736042	0.840926	1.89585	0.121281	4.08855	0.365804	0.259423	0.0873271
TCGA-IQ-A61O	1.15342	1	0	0.360645	0	1.40485	0.566377	0.090718	0.416407	0.0973411	0	0	0.413594	0.685895	1.00159	0.7612	2.22067	0.686523	3.98072	0	0.138683	0.0769695
TCGA-QK-A8Z7	1.07397	0	1.03689	0.78668	0.462681	1.0878	2.21329	1.34119	1.21045	1.57565	0.945982	0	1.17358	2.09136	1.49385	1.21051	1.86983	0.755998	5.03912	1.13659	0.628074	0.390888
TCGA-BA-4075	0.775342	1	0.22367	0.531369	0.702126	2.14062	1.06998	1.30929	0.531668	1.01892	0.310456	0.120617	0.921969	0.261591	0.378623	0.184217	1.53416	0.899098	4.52937	0.0585243	0.0792928	0
TCGA-KU-A6H7	1.60548	0	0.84555	0.569248	0.0871233	1.94649	2.06041	0.141694	0.467749	0.759497	0.712067	2.55985	0.344772	1.3315	0.864454	0.345396	1.67347	0.239398	2.74373	0.427231	0.285994	0.165944
TCGA-CN-5360	5.94247	0	1.42455	0.428786	0.608525	0.754118	1.94651	0.51167	0.96857	0.607484	0.364012	0.415434	0.208642	1.22113	0.654527	3.07483	1.81036	0.380729	3.98618	0.561008	0.685537	0.206893
TCGA-CN-A497	2.91781	0	2.39558	0.663846	0.230449	0.673376	1.98193	0.167229	0.954717	2.42897	0.483261	0.132774	0.344374	1.67667	0.733962	2.00353	0.798673	0.898866	3.94634	1.55797	0.569588	0.123136
TCGA-CV-7177	1.81644	1	0.591488	0.0594937	0.870897	1.78249	0.962956	0.132379	0.60483	0.141956	0.125254	0	1.11603	0	0.766214	2.23398	2.62492	0.413486	3.64205	0.24817	0.173895	0.405775
TCGA-CR-7386	3.91781	0	0	0.0848807	0.118227	0.371057	1.24434	0.0966667	0.15043	1.03125	0	0.130931	0.288772	0	0.162081	1.39638	1.52797	0.300768	3.49557	0.124593	0.352984	0.159758
TCGA-HD-8314	1.83562	0	2.44334	0.0978804	0.578987	0.929564	2.95062	0.111165	1.64607	0.601697	1.64062	0.730836	0.981049	1.32406	0.695103	1.53027	2.72251	0.45628	3.41015	1.57686	0.495388	0.49211
TCGA-P3-A6T8	1.09589	0	0.710878	0.568616	0.887603	1.2405	1.01607	0.464041	1.27668	0.455439	0.176578	0	0.654069	0.719928	0.870818	1.22027	1.11756	0.554933	4.22023	0.0941009	0.590722	0.0415234
TCGA-CN-4725	3.16986	0	1.39977	0.13606	0	1.28363	1.84968	0.225768	0.779806	0.610511	0.0503276	0.270947	0.419107	0	0.350045	0.976584	0.622368	0.123534	4.37866	0.15095	0.191942	0.193078
TCGA-CV-A461	5.65479	1	0.813607	0.563353	0.437228	2.33714	1.50828	0.982875	1.22453	1.68952	0.464145	0.838266	0.825053	0.78115	0.77804	2.07015	2.59022	0.750349	3.13514	0.534958	0.467801	0.285106
TCGA-CV-7568	2.53973	1	0.243791	0.16633	0.0803848	1.72142	1.86517	0.713344	0.338567	0.888383	0	1.14561	1.05047	0.788602	0.712552	0.763497	2.09694	0.328951	4.67717	0.203514	0.53067	0.305562
TCGA-CV-7430	1.35616	1	0.30871	0.0832474	0	0.871686	1.08223	0.280719	0.131853	0.572211	0.0603241	0	0.631989	0	0.107822	1.5064	1.04124	0.337654	4.37789	0.0623981	0.09815	0
TCGA-CN-5363	0.693151	1	0.257735	0.0461418	0.242206	0.703012	0.631896	0.026446	0.234501	0.90912	0	0	0.605779	0	0.213005	0.843421	1.2158	0.356369	4.59463	0.0680516	0.446362	0.129613
TCGA-CV-7236	0.394521	1	0.0939658	0.181421	0.249263	0.782157	0.588805	0.313014	0.336855	0.286408	0	0.274888	0.29678	0	0.28558	0.819505	1.68131	0.399882	4.77194	0.180021	0.422341	0.090447
TCGA-CV-6955	0.915068	1	0.222557	0.0522768	1.20113	0.826599	2.33979	0.0448837	0.174023	0.24062	0	0.0810669	0.281906	0.480886	0.19497	2.17718	0.360196	0.201885	2.90097	0.350045	0.201634	0.806118
TCGA-UF-A71A	0.235616	1	0.659514	0.638398	0.646485	3.48516	0.941482	1.05175	0.654665	1.07803	0.36586	0	0.5474	1.24744	0.870582	2.23122	2.2336	0.702525	4.19836	0.900336	0.367427	0.760945
TCGA-UF-A7JH	2.45479	0	0.917699	0.125387	0.173511	1.25731	2.07132	0.287354	0.793854	0.475811	0	0	0.614192	0	0.617393	0.999856	1.38256	0.336969	3.82738	0.364124	0.23008	0.0618453
TCGA-CV-6962	0.345205	1	0.664847	0.196229	1.1127	2.38629	0.86584	1.00899	0.960808	1.13376	0	0.204391	0.71264	0.230818	0.673737	1.13001	1.09464	0.69332	5.00858	0.722816	0.318114	1.08794
TCGA-CN-4736	1.08219	1	0.375623	0.199248	0.187768	0.77905	0.98178	0.465191	0.533364	0.570851	0.278461	0.388796	0.871371	1.15969	0.569297	1.06136	1.25381	0.518132	3.82603	0.0519985	0.645148	0.0996319
TCGA-D6-6517	0.8	0	0.589955	0.291132	0	1.35716	0.5065	0.303459	0.43189	0.350384	0	0	0.985573	0.484705	0.410124	1.24355	0.720016	0.192194	4.30903	0.272501	0.261471	0.0257376
TCGA-CQ-A4C6	3.70685	0	0.67708	0.200504	0.0976108	0.642286	0.880803	0.407516	0.403595	0.31545	0.215119	0.553066	0.592923	0.916553	0.499884	1.72705	1.2087	0.03492	4.35406	0.151729	0.265317	0.132248
TCGA-CN-5367	0.964384	1	1.02034	0.146264	0.163628	1.24823	1.05901	0.410233	0.464877	0.335941	0.243669	0	0.356707	0.204642	0.416407	1.17172	1.39204	0.102591	3.97817	0.0450235	0.269991	0.114234
TCGA-CR-6470	4.16712	0	0.762902	0.945083	0.50019	1.23622	2.81809	0.224164	0.341189	0.741661	0.0639171	1.83592	0.576861	0.379066	0.599603	1.40414	1.37145	0.284277	3.88467	0.60046	0.566084	0.191689
TCGA-CV-7429	0.293151	1	0.376957	0.136323	0.274172	2.27307	0.764686	0.552771	0.442758	0.512379	0.0750534	0	0.483571	0	0.473527	0.886511	1.61753	0.384602	5.01412	0.490981	0.513693	0.223299
TCGA-CV-7425	4.70685	1	0.730662	0.0618453	0.578214	1.04145	0.693855	0.263034	0.475189	0.516519	0.066537	0	0.626392	0.392537	0.448584	2.03777	0.509949	0.0832474	4.0435	0.0687396	0.0931545	0.0886844
TCGA-CN-6995	0.306849	1	0.179001	0.15004	0	1.3531	0.80091	0.787432	0.549423	0.40414	0.130272	1.11617	0.822689	0.20989	0.202136	0.974823	1.82684	0.090718	4.0158	0.0462815	0.0318186	0
TCGA-CQ-6218	3.43288	0	0.14274	0.0489336	0.256286	1.11676	1.51137	0.223546	0.136323	0.59388	0.0526941	0	0.0709388	0	0.225522	1.00985	0.667211	0.0601858	3.45406	0.0897693	0.0618453	0.0472592
TCGA-CR-6467	4.86849	0	1.14045	0.825379	0	2.20154	2.86817	0.259182	1.2996	1.63287	0.471344	2.23729	0.467488	1.47129	0.673195	1.98852	1.89033	0.504061	3.72342	0.219215	0.71721	0.0747794
TCGA-CV-6933	7.50959	1	0.480782	0.135535	0.636358	2.15001	1.72901	0.599699	0.290424	0.403486	0.319271	0.207018	0.391438	0.30381	0.402395	1.03132	2.09663	0.206393	3.61657	0.315102	0.468114	0.545474
TCGA-UF-A719	4.55616	0	1.22002	0.276199	0.623118	2.15824	3.41092	0.865365	0.566572	1.64275	0.802979	1.09916	0.356482	0	0.178364	1.82175	1.01806	0.191563	3.69853	1.23622	0.171975	0.0780633
TCGA-CN-5370	0.709589	1	0.232047	0.207268	0.148869	0.69813	0.904349	0.760945	0.267955	1.12876	0.0588014	0.312665	0.154194	0.186374	0.422986	0.812211	1.38521	0.0994972	4.02254	0.0206267	0.425567	0.0528332
TCGA-CQ-6221	2.73973	0	0	0.0713508	0.514602	2.00949	0.515612	0.0614306	0.575796	0.584	0.0768327	0	0.671927	0	0.978196	0.696706	2.03615	0.278342	3.84378	0.0794293	0.683023	0.03492
TCGA-CV-7089	5.40274	1	0.237074	0.0831112	0	0.919836	1.87833	0.211635	0.356707	0.662661	0.0601858	0	0.630965	0.190552	0.158596	1.5997	0.787432	0.196859	3.80711	0.160404	0.202261	0.204892
TCGA-TN-A7HI	1.12877	0	0	0.4336	0	1.61937	0.579856	0.519944	1.09667	0.71949	1.0937	1.30165	0.423955	1.62644	0.456701	0	0.800496	0.357383	2.436	0.798258	0.0628125	0
TCGA-CV-A45Z	4.01644	1	0.721504	0.281431	0.463622	2.44002	1.41754	0.516519	0.737168	0.789187	0.301236	0.94718	0.837378	0.82326	0.68437	0.942834	2.11936	0.463099	4.39228	0.465191	0.301471	0.14274
TCGA-CV-5432	10.7671	0	0.80091	0.396927	0.260869	2.73816	1.99233	0.164271	0.60483	0.230203	0.295841	0	1.31684	0.587653	0.568421	1.69541	0.645333	0.108491	4.31707	0.177471	0.362778	0.346872
TCGA-BA-A6DG	0.189041	1	0.273934	0.187514	0	0.675093	1.03182	0.276675	0.873183	0.361095	0.0702519	0.283922	0.383276	0.412077	0.931456	0.294547	1.73712	0.309991	3.78818	0.18612	0.484808	0.152768
TCGA-T3-A92N	0.260274	1	0.494057	0.52657	0.131458	1.13855	1.10259	0.431142	1.42702	0.938399	0.595981	0	1.19365	1.29425	0.51783	0.413269	2.18701	0.767231	4.49639	0.295018	0.444985	0.408386
TCGA-WA-A7H4	1.2137	0	0.754545	0.184978	0	1.12194	1.6132	0.95442	1.28268	0.742351	0.669208	0	0.552475	1.20383	1.33354	0.920598	1.46843	0.407298	3.92292	0.625645	0.700795	0.234133
TCGA-CV-5439	1.49589	1	0.835196	0.033793	0	0.753947	1.52065	0.390448	0.263155	1.03351	0.205518	0.1995	0.698041	0.225275	0.380175	1.82668	1.0418	0.268075	3.95661	0.0742314	0.296663	0.0325241
TCGA-CV-5978	0.589041	1	1.09099	0.273098	0.160017	2.21033	1.40409	0.335483	1.26153	0.386701	0.238542	1.62747	0.936214	0	0.893751	1.396	3.18169	1.15931	4.20589	0.283329	0.35061	1.24385
TCGA-CR-5250	2.18904	0	0.92372	0.532666	0	1.08393	4.1311	0.136454	0.730749	0.631337	0.146655	1.76986	0.48419	0.615228	0.869398	1.92319	1.93885	0.444667	4.18601	0.221692	1.08495	0.193709
TCGA-QK-A652	1.76712	0	0.443819	0.355016	0	1.41706	0.837701	0.184725	1.4508	0.794853	0.330903	0.391988	0.635336	0.775514	0.475811	1.05158	1.17926	0.10916	3.47484	0.217975	0.301822	0.182311
TCGA-CV-6003	4.56164	0	0.556405	0.0318186	0	2.22311	0.588517	0.711231	0.447844	0.950618	0.253989	0.274769	1.41305	0.563939	0.385376	1.3995	1.45628	0.143524	3.69038	0.281906	0.154842	0.0306892
TCGA-CN-A49A	1.4411	1	2.51066	0.657731	0.921817	2.15215	2.63589	0.759326	1.73898	0.995738	0	0	1.0092	0.868134	0.886979	1.09133	2.40128	0.78785	4.26754	0.640251	1.25005	0.257252
TCGA-QK-AA3J	1.27671	0	1.84519	0.403486	0.313014	1.65549	2.74565	0.679964	0.705226	1.14841	0.188021	0	1.21444	1.50823	0.549916	0.50711	1.67111	0.444455	3.76117	0.48553	0.717737	0.0588014
TCGA-CN-4722	4.06301	0	0.682034	0.202261	0.848077	0.719578	1.52947	0.0540844	0.381837	0.269632	0.051024	0	0.166201	0	0.592636	1.60654	0.815002	0.168257	3.83977	0.0699771	0.194465	0.0230424
TCGA-CR-7390	4.13151	0	1.36154	0.0989585	0.341075	3.42911	1.8768	0.745194	0.425782	0.493135	0.0718999	0.199625	0.728922	0	0.328032	1.87393	1.42889	0.151859	5.28343	0.167743	0.268315	0.0957219
TCGA-CV-7437	1.3863	1	0.522859	0.133169	1.92193	2.6899	1.54052	0.0197731	0.560128	0.617957	0	1.19358	0.613154	0.229711	0.925999	1.27441	1.85388	0.466131	4.21638	0	0.439144	0.128689
TCGA-CN-5373	4.33973	0	0.661385	0.100843	0.626205	0.390888	2.45778	0.287472	0.223546	0.374733	0	0.2949	0.358509	0.229465	0.43808	2.06636	0.927972	0.131194	3.28159	0.0508847	0.385486	0.0332292
TCGA-CR-7391	2.50137	0	0.560421	0.186247	0	0.65205	1.07813	0.344715	0.348912	0.36793	0	0.245009	0.157173	0.189919	0.345169	1.96018	0.828713	0.273576	3.40353	0.286526	0.443607	0.0538064
TCGA-CV-A45T	13.3041	1	0.0858325	0.449957	0.156397	0.783331	0.939678	0.573181	0.471968	0.536053	0.433814	0.967833	0.37529	0.904349	0.504468	0.261832	1.03274	0.183201	2.95895	0.330214	0.155231	0.109026
TCGA-D6-6826	0.953425	1	1.2509	0.370834	0.600079	1.00288	1.61716	0.298893	0.781905	1.02567	0.211635	0	0.913339	0.177471	0.868687	2.40689	1.56457	0.8222	3.96463	0.235359	0.771463	0.0253123
TCGA-CR-6493	0.772603	1	0.599603	0.0688771	0	1.07231	1.4086	0.952334	0.288536	0.566182	0.0740944	0.94028	0.747087	0.607579	0.163241	0.442227	0.724999	0.0513025	4.39608	0.149389	0.231064	0.0336521
TCGA-CX-A4AQ	4.26027	0	0.229465	0.729531	0.312317	2.51208	0.403813	1.31441	1.65237	0.707613	0.799419	0	0.940956	2.34721	1.58082	0.76562	2.18745	0.645794	3.70918	0.888617	1.59436	0.1149
TCGA-CV-6942	11.7315	0	0.207393	0.358621	0	0.93327	1.29131	0.4959	0.660929	0.705403	0.528571	0.716332	0.37829	0.631989	0.487795	1.32556	0.767655	0.113967	3.07454	0.131458	0.592636	0.136323
TCGA-CQ-6228	1.24932	1	0.722379	0.202888	1.75223	3.33775	1.06743	1.29496	0.516116	0.562963	0.301705	0.491186	1.34744	0.206768	0.465295	1.86366	2.4083	0.265677	4.73606	0.67238	0.599127	0.481092
TCGA-HD-A634	0.356164	1	0.126841	0.0854247	0	3.11645	1.02375	0.792356	0.996678	1.27816	2.10091	0.467279	1.89519	1.85431	1.05429	0	1.279	0.956577	4.15955	0.422771	0.439783	0
TCGA-CV-6950	1.25753	1	0.454071	0.189413	0	1.36905	1.1932	0.189287	0.567643	0.897085	0.105142	0.777704	0.469261	0.586116	0.270589	1.65334	1.32158	0.119688	4.56674	0.073409	0.381616	0.0480967
TCGA-CQ-5324	4.36438	0	0.130272	0.044604	0	0.59053	0.437441	0.363676	0.130667	0.388024	0	0	0.126576	0	0.31742	0.942158	1.46503	0.328147	4.58634	0.0976108	0.345851	0.0430645
TCGA-CX-7085	0.879452	0	0.420833	0.535754	0.0742314	0.44615	1.24775	0.160533	0.346758	0	0.0571383	0	0.185105	0.181293	0.265437	1.71918	1.1137	0.187261	3.62244	0.0590783	0.455334	0.0762854
TCGA-BA-A4II	2.51507	0	0.586308	0.067088	0.093425	0.997401	1.77197	0.587269	0.587557	0.494876	0.206393	0	0.571822	1.3384	0.662388	0.661567	0.881038	0.113834	3.09506	0.319155	0.325962	0
TCGA-CR-7397	2.06575	0	0.415651	0.288772	0	1.80756	1.26724	0.361544	0.73933	0.347552	0	0	0.490365	0.992406	0.723952	1.9437	2.26102	0.423955	3.7627	0.342441	0.464459	0.0380147
TCGA-CV-7250	7.94521	1	0.83285	0.271904	0.595504	0.940731	1.67582	0.559639	0.331705	0.532367	0.41738	0.217231	0.683652	0	0.355693	1.33503	1.26484	0.214	4.86547	0.56774	0.410558	0.0356239
TCGA-CN-6021	0.756164	1	0.408603	0.176833	0.794353	1.17709	1.23217	0.215865	0.699285	0.279412	0.0661236	0.422771	0.172488	0.208268	0.303693	1.59498	1.07265	0.201759	4.16166	0.733701	0.179384	0.417704
TCGA-T2-A6X2	2.70411	0	1.64048	0	0	0.950842	0.951066	0.581014	0.743644	0.858538	0.341986	0	0.38084	0.915483	0.756169	1.49626	1.12935	0.327572	4.33938	0	0.484293	0
TCGA-CQ-5329	5.87123	0	0.289598	0.19862	0	1.70487	1.29725	0.590434	0.813853	0.93138	0.308827	0.658189	1.23131	0.840604	0.556012	1.48836	1.89185	0.558953	4.13935	0.253505	0.759752	0
TCGA-CN-6019	2.84384	0	0.245496	0.317651	0.604071	1.19535	0.761115	0.255078	0.354903	0.613249	0	0	0.292664	0	0.625832	1.14084	2.0588	0.495593	4.1985	0.242694	0.108625	0.307778
TCGA-CV-A45V	0.0876712	1	0.664483	0	0.563939	0.833821	1.95464	0.352984	0.562181	0.308827	0.143655	0	0.437867	0.429536	0.607295	1.94505	0.817132	0.245617	3.45178	0.194591	0.387473	0.27608
TCGA-CR-6487	0.641096	0	0.895845	0.682483	0	1.05894	2.44811	0.428142	0.254473	0.498864	0.591967	1.27608	0.856229	0	0.219958	1.79369	1.10842	0.184978	4.032	0.419539	1.04726	0.27608
TCGA-CQ-5327	4.54795	0	0.632082	0.24184	0	0.732747	0.471135	0.434775	0.49917	0.69323	0.478713	0	0.340961	0	0.237441	1.41927	1.07881	0.238787	4.82988	0.0947766	0.340733	0.0622599
TCGA-UF-A7JC	1.49589	1	0.511367	0.190552	0.136716	0.750864	1.48182	0.804054	0.446362	0	0.29678	0	0.908352	0.324465	0.230203	1.69862	0.886667	0.120485	4.02319	0.306029	0.19333	0.494672
TCGA-MZ-A6I9	1.33973	1	0.636265	0.0962619	0.175684	1.3544	1.42605	0.38084	0.917775	1.3691	1.02956	2.0352	0.588805	1.40212	0.536849	1.23297	1.43568	0.372841	3.19882	0.424492	0.78576	0.151859
TCGA-CV-6436	5.20274	0	0	0.0180644	0	0.792606	0.361544	0.203264	0.111031	0.520347	0	0.0558898	0.102725	0	0.333195	0.086512	0.44615	0.196985	1.82952	0.0401209	0.0274372	0.0174944
TCGA-BA-4074	1.26575	1	0.146395	0.59827	0	1.44037	1.43301	0.755486	0.706287	0.477263	0.653702	0	0.969454	0.707525	0.430178	0.333653	1.99812	0.0556122	4.91563	0.0920721	0.0257376	0.0244615
TCGA-CN-6989	2.68493	1	0.666211	0.282618	0.314755	1.03323	0.891419	1.16092	0.457016	0.712376	0.065848	0	0.62068	0.388686	0.421695	1.11443	1.63724	0.167101	4.32356	0.274172	0.374845	0.626112
TCGA-CR-7399	0.49589	0	0.562084	0.617016	0.531269	2.06557	1.1551	0.358621	0.675455	1.049	0	0.0866479	1.2372	1.18326	0.56988	0.66029	1.1811	0.184598	4.48063	0.967685	0.742006	0.0272956
TCGA-CN-5359	1.03288	1	1.68943	0.707613	0.72561	2.81861	1.80773	0.691177	0.803888	0.787767	0.125651	0.179256	1.23683	0.929488	1.00978	1.84068	2.41727	0.518031	4.3555	0.323312	0.648834	0.759412
TCGA-CV-6953	4.49589	1	0.590913	0.0593553	0.235605	0.802979	0.962068	0.116232	0.258941	0.141825	0.240131	0.337083	0.205893	0.378512	0.141302	1.40289	0.506703	0.0514417	3.93611	0.0443242	0.304044	0.0289934
TCGA-CR-6481	0.852055	0	0.624148	0.520246	0.171847	1.10996	1.59832	0.152119	0.396817	0.372395	0.0458623	1.08814	0.285461	0.146655	0.496616	1.77311	0.963548	0.208018	3.44124	0.181039	0.165558	0.119954
TCGA-IQ-A61G	0.986301	0	0.0949116	0.154194	0.172488	2.07032	0.919226	1.37707	0.385818	0.783247	0.314058	0	0.7589	0.569005	0.314058	0	1.19906	0.14496	3.73799	0.0936954	0.141564	0.120485
TCGA-BA-4076	1.13699	1	0.556601	0.333996	0.286881	1.74459	1.3878	0.850559	1.20539	0.923339	0.153546	0	0.579856	1.08161	0.268075	0.594357	1.40746	0.206893	4.25323	0.054779	0.127765	0.233888
TCGA-BA-6872	1.05205	1	0.432853	0.158596	0.113434	2.95231	0.576861	0.550211	0.233152	0.280006	0	0.348232	0.375178	0	0.392977	0.191689	1.00619	0.0803848	4.321	0.0610158	0.253021	0.0787464
TCGA-CN-4738	1.19452	1	0.742179	0.367707	0.170822	1.00554	2.05318	0.399226	0.74373	0.349931	0.311154	0.356031	0.984626	0.213503	0.523763	0.906275	1.84603	0.193078	4.05858	0.221692	0.668664	0.331934
TCGA-CN-4727	4.27397	0	0.728748	0.113434	0	1.79131	1.34415	0	0.33754	1.227	0	0	0.0563061	0.256769	0.430285	0.848478	0.541317	0.182057	4.17758	0.0852887	0.288654	0.0740944
TCGA-CN-6997	2.70685	1	0.412294	0.469157	0.82603	1.52997	1.56662	0.987248	0.522759	1.20458	0.395831	0.653885	0.932893	0.725698	0.552279	1.22854	2.6396	1.00137	4.67313	0.480058	0.40621	0.815411
TCGA-CV-A45W	3.83014	1	1.13855	0.48419	0.179001	2.18729	1.70075	0.861717	0.842939	0.299479	0.934026	0.598937	0.810731	1.227	0.870187	1.50432	1.67527	0.484602	3.82291	1.20714	0.663299	0.397365
TCGA-CN-A63V	1.86027	0	0.200253	0.0695647	0.273576	1.28351	0.188401	0.721854	0.641546	0.790105	0.340847	0.107688	0.100574	0.912956	0.340847	0.787265	1.13007	0.430285	4.28036	0.243547	0.512682	0.0672257
TCGA-MT-A51X	0.663014	0	1.01521	0	0	0.767655	2.0505	0.528471	0.472592	0.440527	0.073409	1.24227	0.886823	0.758644	0.464355	1.2037	0.570657	0.0673634	3.02015	0.148088	0.229096	0.0333701
TCGA-CR-7373	2.43562	0	0.336055	0.148999	0.940505	0.35682	0.576571	0.43082	0.472904	0	0.129481	0.184471	0.39835	0.552377	0.328836	1.18783	1.17938	0.168	4.50744	0.133695	0.261711	0
TCGA-CR-7394	3.68767	0	0.584866	0.352194	0	0.531868	1.44186	0.191689	0.406863	0.561595	0.0835197	0	0.165044	0	0.250719	1.59932	0.703189	0.193078	3.4132	0	0.207268	0.0750534
TCGA-CV-7428	4.57808	1	0.506805	0.406972	0	0.982364	1.63329	0.278223	0.259303	1.02169	0.263996	0	0.347325	0.414352	0.586981	2.86124	1.146	0.164271	3.8287	0.0490731	0.499578	0.0941009
TCGA-CV-A45P	1.75068	0	0.510152	0.0844725	0	0.0905825	1.0155	0.156914	0.292546	0.531169	0.120086	0.589092	0.338567	0.517124	0.417056	1.47088	0.798258	0.136454	3.66262	0.104068	0.304394	0.256044
TCGA-CV-5434	9.07945	1	0.690641	0.267596	0.895845	2.46386	1.36815	0.648373	0.643117	0.701593	0.410992	0	1.0036	0.933573	0.232415	2.08454	1.88307	0.663846	4.23805	0.10541	0.375735	0.817623
TCGA-CV-A6K1	1.87671	0	0	0.0576929	0.156785	1.53903	0.546166	0.504976	0.601506	0	0.480989	0	0.123534	0	0.565207	0.137241	0.795268	0.215244	3.33438	0.203765	0.168899	0
TCGA-CV-5441	7.90685	0	0	0.514804	0.538737	0.82985	1.89616	0.0434845	0.68446	1.12829	0.0810669	0	0.555718	0.968865	0.859493	1.50391	0.422341	0.118891	4.14454	0.463413	0.701327	0.418352
TCGA-CV-7446	2.99452	1	0.921513	0.112233	2.19219	2.04646	2.39586	1.28262	1.23432	0.675274	0.763921	0	1.04565	0.470407	0.709026	1.12974	2.41762	0.518535	5.14511	0.913033	0.424922	0.209516
TCGA-UF-A7JO	1.72877	1	0.26135	0.337654	0.0866479	1.47046	1.38527	0.550211	0.705403	0.518233	0.463727	0.35095	0.850159	1.1737	0.403922	1.5537	1.64542	0.16954	3.62367	0.218471	0.264116	0.252173
TCGA-CN-4734	4.63014	0	0.32435	0.0878701	0	0.419215	0.305795	0.454597	0.258097	0.0723116	0	0	0.205142	0	0.193583	1.74623	0.764431	0.168385	3.94146	0.065848	0.213254	0.0848807
TCGA-CR-6492	1.31233	0	0.503756	0.14274	0.0687396	0.691445	1.46535	0.45038	0.815084	0.173639	0	0.346758	0.516721	0.695459	0.458277	1.43136	0.988776	0.284633	4.05001	0.706641	0.387583	0.223299
TCGA-BA-6871	0.29589	1	0.476434	0.395502	0.747688	0.676358	1.23952	1.44175	0.994218	1.52115	0.263034	0	0.921969	1.37329	0.833578	0.240742	1.50294	0.281075	4.91764	0.254836	0.602362	0
TCGA-CV-7247	1.58082	1	0.316146	0.166073	0.297368	1.88233	0.544881	0.28759	0.151209	0.722204	0.178237	0.967538	0.896388	0.660746	0.237931	1.84254	1.48145	0.481402	4.21357	0.18409	0.422879	0.18574
TCGA-CV-A6JM	0.531507	1	0.35727	0.188907	0	2.82536	0	0.959993	0.163112	0	0	0	0.308594	0	0.829444	0.424707	1.38935	0.215368	4.08044	0.0247452	0.146003	0
TCGA-CV-6959	0.70137	1	0.430713	0.0809305	0	0.639973	0.723864	0.642008	0.40021	0.604451	0.169284	0.0844725	0.643764	0.350497	0.338111	1.02567	1.24817	0.161823	3.97885	0.0406821	0.315334	0
TCGA-F7-A61S	1.57808	0	0.370499	0.175812	0	1.72133	0.242206	0.414677	0.630312	0.967685	0.355467	0.266637	0.773996	0.300299	0.652234	0.842054	1.2005	0.272262	3.40728	0.224905	0.157173	0.0875986
TCGA-CQ-5331	3.83288	0	0.838589	0.220701	0.43189	1.80166	1.43819	0.332851	0.471864	1.10514	0.0422241	0.427821	0.335255	0.373175	0.610228	1.59546	0.941031	0.205142	4.00692	0.0292762	0.447421	0.092884
TCGA-CN-6018	1.58904	1	0.219587	0.113434	0.206143	1.9641	0.692159	0.169412	0.489235	0.740366	0.160404	0	1.30725	0	0.146525	0.617204	1.44932	0.418352	4.20184	0	0.72334	0.109695
TCGA-CV-A45U	2.95616	1	1.13953	0.155879	1.38189	2.13822	0.568421	1.6554	1.31644	0.880881	1.03252	0	1.19661	1.0135	0.740712	0.877744	3.08534	0.570851	3.61091	0.633757	0.685537	0.441483
TCGA-MZ-A7D7	1.49863	0	0.65764	0.193835	0.490262	1.88881	1.46347	0.202261	0.475915	1.89122	0.331476	0	0.395173	0.597889	0.460271	0.554834	1.43103	0.299127	3.4668	0.420725	0.14991	0.187514
TCGA-UF-A718	5.4	0	0.757877	0.170053	0	1.74528	1.97878	0.308128	0.415542	0.547252	0.0635029	0.258217	0.278936	0.200379	0.595504	1.652	1.07053	0.404903	4.05211	0.0867838	0.746399	0.0846086
TCGA-CV-6956	0.594521	1	0.807272	0.136979	0.189287	0.643117	0.643302	0.889785	0.192699	1.40724	0	0.108357	0.522458	0.236095	0.34301	0.889629	0.735609	0.0942361	3.82054	0.245131	0.515712	0
TCGA-CN-A499	1.96438	0	0.941332	0.321813	0	1.05256	1.99183	0.816559	0.612022	1.54176	0.309758	2.07711	1.01035	1.25623	0.627046	1.31892	2.14776	0.158854	4.09603	0.1145	0.658189	0.0753273
TCGA-BB-8601	1.70959	0	0.964436	0.0978804	0	1.75489	1.98899	0.623773	0.531169	1.02503	0.381394	0.730836	0.904118	0.32262	0.426426	1.02155	2.32395	0.535953	4.64104	1.10313	0.146525	0.831148
TCGA-IQ-A61I	0.00547945	1	0.161952	0.235727	0.151989	2.54409	2.29154	0.0943712	0.434562	1.0474	1.64459	1.16098	0.23008	1.42809	0.587557	0.471031	1.40425	0.159242	4.39621	0.304277	0.0705267	0.0801119
TCGA-CV-7104	1.07671	1	0.301588	0.0723116	0	0.582556	0.660472	0.355129	0.265437	0.706906	0.0779266	0	0.379288	0	0.588996	1.25375	1.18352	0.0886844	3.72172	0.0272956	0.12618	0.0353424
TCGA-BA-A6DI	0.920548	1	0.798839	0.105008	0	1.46759	2.20905	0.147828	0.819178	0.503756	0	0.373954	1.05401	0.344601	0.434775	1.13849	1.38665	0.486045	3.23813	0.463936	0.375512	0.241718
TCGA-F7-A61V	2.07945	0	0.195348	0.0343566	0	0.828388	0.859731	0.0196308	0.439464	1.08678	0.142479	0.202637	0.144699	0.228849	0.190931	1.12267	0.56774	0.214374	3.31027	0.343124	0.257614	0.0655723
TCGA-CN-4733	4.34521	0	0.231432	0.528971	0	0.902267	0.816149	0.206643	0.181166	0.512075	0	0.240009	0.225028	0	0.42191	1.0914	0.76086	0.245131	3.21791	0.0204844	0.245861	0
TCGA-CR-7379	2.83836	0	0.541217	0.0308304	0.16543	1.65846	0.686164	0.578214	0.660107	0.510456	0.128425	1.23426	0.130404	0.206893	0.14509	1.94546	1.38659	0.138945	4.32411	0.0230424	0.031254	0.0297002
TCGA-UF-A7JJ	1.50411	0	0.544485	0.449218	0.228234	2.04963	0.599603	0.654069	0.748805	1.36261	0.545375	0	0.289716	1.06164	0.647913	1.13205	1.47985	0.411752	3.50234	0.154713	0.405557	0.371726
TCGA-CN-5358	0.715068	1	0	0.560715	0.416083	0.467593	0.640066	0.538141	0.316262	0.133958	0.118227	0.389677	0.120086	0	0.346645	1.29437	0.945083	0.33754	3.20047	0.102457	0.49774	0.0540844
TCGA-CV-5436	1.6	1	0.120219	0.119688	0.405557	2.47342	0.573375	0.279768	0.383829	0.278104	0	0.537743	0.706464	0	0.117429	0.645517	1.61367	0.0894982	4.5904	0	0.303576	0.115699
TCGA-BB-4217	0.512329	0	0.424815	1.06936	0.146134	0.891264	1.59965	0.907737	0.729357	0.803227	0.218347	0	0.556307	1.05825	0.586212	1.014	2.06626	0.557582	4.29839	0.242572	0.630592	0.0771062
TCGA-CN-4731	2.73425	1	0.936139	0.804301	0.336398	1.48769	1.91219	0.736302	0.251204	0.426533	0.323543	1.06778	0.690104	0.22231	0.349705	0.752577	1.57454	1.20157	4.1707	0.0492125	0.0990932	0
TCGA-F7-A623	1.68767	0	0.342441	0.151989	0.322274	2.26228	1.64722	0.887837	1.06185	1.4297	0.468218	0	0.540722	0.96547	0.477366	1.27143	2.76971	0.513592	3.16024	0.596935	1.24221	0
TCGA-CQ-7069	3.49041	0	0.974015	0.31034	0.153935	2.034	1.36759	0.543001	0.836328	0.577054	0	0.586404	0.553557	0.362666	0.80331	2.2974	1.04886	0.406646	3.74077	0.123401	0.611833	0
TCGA-D6-6825	1.34521	0	0.366588	0.163499	0	1.25882	1.1501	0.753177	0.564232	0.868924	0	0	0.316725	0.753605	0.277152	1.97706	0.862193	0.1149	3.89578	0.123401	0.608052	0.0969365
TCGA-P3-A6SX	3.91781	1	0.815575	0.0299829	0	1.46561	1.41181	0.60046	0.524164	0.141956	0.347099	0.547055	0.0436245	0.808014	0.220082	1.15989	1.86378	0.0870554	4.20584	0.129349	0.675997	0.0574156
TCGA-CV-7432	7.0411	1	0.599699	0.0897693	0	0.633664	0.883386	0.709291	0.0727232	0.395502	0.0650208	0.739934	0.209391	0.205142	0.22367	0.607105	1.20151	0.0448837	4.58863	0.0227584	0.334111	0.0583858
TCGA-KU-A6H8	0.89589	1	0.097476	0.0970714	0	2.19887	1.74739	0.245617	0.629287	0.542506	0.0703893	0.101247	0.746915	0.22132	0.541019	1.60611	1.35935	0.560813	3.76649	0.0963968	0.291486	0.210264
TCGA-CQ-5326	0.243836	1	0.708231	0.224411	0	0.687329	1.59364	0.577731	0.123004	0.499476	0.125254	0	0.206268	0.20201	0.0866479	1.09248	0.936063	0.135666	4.09264	0	0.502432	0.0574156
TCGA-DQ-5625	3.10411	1	0.171079	0.0877344	0	1.05478	2.06447	0.0340748	0.147046	0.78157	0.0635029	0	0.350158	0	0.38637	1.01593	0.810237	0.0795658	3.89041	0	0.131589	0.0569996
TCGA-CV-5977	5.0411	0	0.479024	0.0735461	0	0.946282	0.372952	0.273814	0.378512	1.51788	0.0791562	1.92029	0.787182	0.246955	0.414785	0.173639	0.945158	0.0367495	4.61407	0.133827	0.196607	0
TCGA-CR-7385	2.73151	0	1.9952	0.319387	0.661294	1.87307	3.57959	0.359634	1.49651	1.14965	0.531369	1.79044	0.883543	0.669208	0.265917	1.59517	1.86734	0.407081	3.2539	0.691087	0.911423	0.262313
TCGA-T2-A6X0	0.591781	0	0.692427	0.218595	0.655993	1.72552	2.15753	0.1133	1.18802	0.891108	0.77011	0.874128	0.728835	1.29907	0.783666	2.56142	2.77511	0.56472	4.11834	0.314174	0.743989	0.39605
TCGA-CN-6016	3.95342	0	0.32964	0.227002	0	1.06956	0.714751	0.196607	0.416407	0.188654	0	0	0.36793	0	0.638584	1.97049	1.46697	0.135009	4.02997	0.11703	0.428786	0.038998
TCGA-F7-7848	3.09863	0	1.88041	0.269512	0.771379	0.599318	1.83835	0.434988	0.541019	0.642563	0.797594	0.192825	0.708055	1.09855	1.1281	2.04523	1.29178	0.513794	4.36216	1.16311	1.21487	0.121811
TCGA-CN-6017	2.33699	1	0	0.584963	0	1.54533	0.488618	0.166587	0.340391	0.159758	0	0.1038	0.670297	0	0.356144	1.11443	1.3372	0.269632	3.36541	0.098689	0.28404	0.0962619
TCGA-CV-7440	1.84932	1	0	0.217355	0	0.743127	1.124	0.128029	0.198243	0.485118	0	0	0.0480967	0.221444	0.241352	0.649202	0.815657	0.0881416	4.33348	0	0.205768	0
TCGA-UF-A7JS	1.86301	1	0	0.0999011	0	2.39947	0.490159	0.813525	0.162339	0.234256	0.388686	0	0.607674	0.596649	0.357383	0	1.05492	0.110497	2.99028	0.111031	0.125651	0.0490731
TCGA-CV-A45R	15.0137	0	0.557189	0.0936954	0.0880059	0.656725	1.65278	0.371392	0.84535	0.730749	0.419431	2.54426	0.753519	0.712552	0.907967	0.988776	0.816804	0.107286	3.66715	0.180148	0.528771	0.0308304
TCGA-MT-A67A	2.50411	0	0.111432	0	0.104337	0.679063	1.63441	0.146003	0.737946	0.888617	0.756426	0.222681	0.552967	0.651591	0.393197	0	0.931607	0.161307	2.73014	0.212258	0.130536	0.107286
TCGA-CV-7414	0.0383562	1	0.853038	0.454808	0.98943	3.43596	1.62817	0.331934	0.254352	0.139077	0.122739	0.472072	0.476226	0.197991	0.608525	1.14339	1.65315	1.01835	3.91696	0.795019	0.370388	0.0835197
TCGA-CR-7374	0.0821918	0	0.959102	0.567643	1.31794	1.92505	2.88626	1.45854	1.33027	0.616734	0.391658	0	1.11257	0.755998	0.773068	1.79793	2.00971	1.1689	4.12862	0.780058	0.699729	0.8222
TCGA-CN-6013	1.99178	1	1.15814	0.155231	0.713256	0.964805	1.48254	0.552771	0.334225	0.152768	0.134878	0.279174	0.517427	0	0.289952	2.25671	1.93994	0.203138	2.97812	0.325847	0.853836	0.15004
TCGA-QK-A8Z9	1.23014	1	0.551393	0.127897	0.43082	2.13314	1.36143	0.74028	0.733528	0.815329	0.340847	0	0.624616	1.34778	0.710261	1.41321	2.112	0.497229	4.29932	0.186374	1.01421	0.0836559
TCGA-QK-A6VB	1.75616	0	1.50579	0.232047	0.316841	1.90381	2.15254	1.54498	1.50152	1.0513	0.129745	0.808838	0.944259	1.16761	0.751978	2.94933	2.52697	0.1956	4.18477	0.587749	0.235359	0.528271
TCGA-CR-7382	2.18082	0	0	0.441908	0	0.498353	1.20176	0.690641	0.609566	0.462157	0	0	0.335483	0.449746	0.586789	2.04681	1.31475	0.339365	4.45035	0.0801119	0.591584	0.0695647
TCGA-P3-A5QA	5.97808	0	0	0.318114	0	1.61706	0.762136	0.0597706	1.07738	0.838669	0.0747794	0.946806	0.518535	0.769687	0.569102	0.568421	1.34045	0.234379	3.52008	0.077243	0.406754	0.0339339
TCGA-CV-5979	3.60274	0	0.850559	0.0380147	0	1.3488	0.679694	0.12618	0.264596	0.478506	0.229588	0.415975	0.4336	0.465609	0.304745	1.12048	2.06612	0.0281448	3.88553	0.187514	0.250355	0
TCGA-CV-A6JE	2.94521	0	0	0.230941	0	1.95509	0.188907	0.864889	0.736821	0.0854247	0.667302	1.80166	1.11056	0.915024	0.473943	0	1.17543	0.14274	3.06676	0.413594	0.105008	0.067501
TCGA-4P-AA8J	0.279452	0	0	0.341189	0.222681	2.29819	0	0.624616	1.72308	0.523361	0.173639	0	1.56037	2.20176	0.811882	0.195474	2.05946	0.502636	3.47138	0.313362	0.293724	0.118891
TCGA-CV-6936	0.454795	1	0.429643	0.157173	1.17018	1.25017	1.6906	0.777283	0.770195	0.53087	0.319965	0.0724489	0.657	0.956131	0.175045	0.975263	1.05436	0.123269	4.20774	0.118626	0.332164	0.131326
TCGA-CR-7393	2.72055	0	0.132774	0.291604	0	0.94733	1.95936	0.219587	0.34551	0.478506	0	0.137897	0.458382	0.297015	0.358734	2.34224	1.28208	0.574538	3.41629	0.5144	0.295605	0.0439044
TCGA-CV-7103	4.3589	1	0.732399	0.362217	0	2.65714	1.16279	0.233275	0.657091	0.462366	0.306496	0.498557	0.849519	0.393636	0.494569	1.19484	2.25354	0.562084	4.13426	0.590913	0.316377	0.145351
TCGA-CQ-A4CG	1.17808	1	0.224164	0.29066	0.109026	1.3384	1.36412	0.252416	0.489954	0.810978	0	0.232415	0.827331	0.483983	0.252658	1.84547	2.31829	0.245739	4.33284	0.115033	0.422125	0.516923
TCGA-CQ-6220	2.69863	1	0.502534	0.127237	0	1.5148	0.722816	0.438719	0.25689	0.482022	0.136716	0.36614	1.00748	0.219958	0.239642	0.927821	0.860764	0.125651	3.66451	0.163499	0.289716	0
TCGA-BA-4078	0.756164	1	2.08899	0.55395	1.94058	2.28942	2.57976	1.42557	1.57245	0.339822	0.432318	1.23511	1.27536	1.88792	0.709555	1.37067	1.4812	0.989648	4.76104	0.593497	0.822037	0.165687
TCGA-BB-4224	0.761644	0	1.46524	0.553459	0.337197	1.03928	3.74447	1.30381	0.971222	1.93233	1.35778	1.57444	1.6564	1.87676	0.754973	0.543694	1.40898	0.339479	3.02274	0.622181	0.388134	0.345851
TCGA-TN-A7HJ	1.10411	0	0.927972	0.232415	0.357496	1.19396	2.38593	0.556307	0.639788	0.452385	0.76545	0.108625	0.328147	1.27911	0.550901	1.15173	0.834954	0.151599	3.19952	0.436055	0.410992	0.164143
TCGA-BB-4228	1.53151	0	1.02297	0.367259	0	0.819259	3.56746	0.063641	0.49968	0.539531	0.0797024	1.49395	0.972766	1.21269	0.869082	0.928048	2.44705	1.05123	4.30473	0.393526	0.326767	0.0361868
TCGA-H7-7774	1.11507	0	0.555129	0.0443242	0	0.379954	1.63678	0.268554	0.148218	0.582845	0	0	0.15549	0.152248	0.350271	1.53889	0.27274	0.167229	3.23654	0.187768	0.352533	0.275722
TCGA-P3-A5QF	0.90411	1	0.731096	0.133958	0.42503	1.64076	2.89819	0.0395596	0.673918	1.35366	0.60862	1.42105	1.07204	1.03083	0.539333	0.44074	2.45162	0.303459	3.52008	0.502229	0.168129	0.276794
TCGA-CN-5356	3.86027	0	0.421048	0.129217	0.337882	1.69417	1.82326	1.15776	0.397365	0.299127	0.313246	0.0822938	0.439464	0.487178	0.412185	0.939076	1.26442	0.222063	4.80837	0.751207	0.504671	0.0513025
TCGA-CV-7099	0.665753	1	0.423955	0.032383	0	0.729444	1.88272	0.390448	0.277866	0.475396	0.197488	0.0990932	0.582171	0.404903	0.341189	1.35265	1.05353	0.20989	4.38394	0.0712135	0.244035	0.259544
TCGA-CR-6472	2.87671	0	0.806613	0.288063	0.208642	0.985209	2.09555	0.230818	0.503043	0.493135	0.619272	1.3055	0.447103	0.259905	0.435095	0.856946	1.74136	0.158078	4.40164	1.41386	0.388024	0
TCGA-CN-4741	6.13425	0	1.77256	0.269273	0.705049	0.881195	2.57231	0.045443	1.2444	0.589284	0.357946	1.63427	0.549324	0.950692	0.5065	1.7542	0.914258	0.298658	3.62378	0.256165	0.859652	0.194213
TCGA-T2-A6WZ	1.32603	1	0.157949	0.10675	0	1.89701	0	0.178364	0.188021	0.732139	0.499986	0.567059	0.924556	0.866552	0.421048	0	1.09018	0.10541	2.91422	0.0802483	0.0551957	0.052555
TCGA-CV-7097	1.05479	1	0.270947	0.12618	0.330444	1.92615	0.471968	0.654802	0.177854	1.0481	0.0694272	0	0.341644	0	0.418028	0.834388	1.17127	0.139469	4.3512	0.117695	0.188148	0.0622599
TCGA-CV-A464	4.71781	0	0.108089	0.175301	0.101247	1.84085	0.790021	0.557974	0.760945	0.709555	0	0.404794	1.04068	0.635801	0.972693	0.914641	1.82257	0.213254	3.49175	0.132379	0.305912	0.0354832
TCGA-HD-8224	1.22192	1	1.49165	0.0607392	1.22064	1.68522	1.87456	1.23229	0.698574	0.708143	0.127765	1.65718	0.461109	0.690462	0.743127	2.32037	1.6164	0.541614	3.39536	0.0893626	0.726308	0.367818
TCGA-D6-A6EO	2.07945	0	0.645148	0.522759	0	0.955015	2.41743	0.0339339	0.6054	2.07758	0.393855	0.476122	0.382833	0.531768	0.362217	1.6955	0.637471	0.16092	4.00431	1.23958	0.518938	0.239642
TCGA-BB-A6UM	1.07671	0	0.946731	0.0621217	0	1.88503	2.45078	0.0878701	0.887603	1.53212	0.413486	2.32089	0.901108	0.957915	0.738292	1.19617	1.92243	0.819341	3.29216	0.354001	0.44074	0.0302654
TCGA-CN-5361	5.80822	1	0.125651	0.125122	1.28989	2.37443	1.52321	0.633943	0.775177	0.375067	0.406537	0	1.13172	1.32763	0.823342	1.30889	1.70434	0.290896	3.79605	0.182438	0.468114	0.196355
TCGA-CR-7372	2.07945	0	0.0988238	0.190552	0	1.33171	2.27819	0.111833	0.688136	0.300299	0	0.528471	0.894915	0	0.890174	1.77315	1.20445	0.238665	3.58447	0.0250288	0.178109	0.0640551
TCGA-QK-A6II	0.778082	1	0.207893	0.0486547	0	0.528371	0.1333	0.338453	0.0939658	0.224781	0	0.0754642	0.17031	0.166715	0.506094	0.116232	0.474566	0.0539454	3.66016	0	0.024887	0.0237521
TCGA-F7-A624	1.03562	0	0	0.376735	0.0695647	1.75557	0.136323	0.176706	0.333195	0.863859	0.463099	0.411426	0.329411	0.322851	0.229096	0	1.68001	0.153935	4.30519	0.319734	0.236707	0.139731
TCGA-BB-4223	8.82466	0	1.99653	0.742869	0.484602	1.49999	2.67834	0.42664	1.15795	1.40915	1.20132	1.41479	0.552082	1.82065	0.790522	2.55021	2.82963	0.531968	4.37881	0.861876	1.19912	0.227864
TCGA-HD-7831	1.8274	0	0.277033	0.0980152	0	0.748118	1.25574	0.0843364	0.792606	0.517931	0.10541	0.731705	0.7376	0	0.499068	1.34903	1.97578	0.165172	4.08717	0.0735461	0.321697	0.139862
TCGA-CV-A6JO	0.539726	1	0.506196	0.128293	0	1.08699	0.837782	0.309176	0.207268	0.801655	0.0705267	0.196229	0.458067	0.221692	0.296193	1.24208	1.13481	0.149259	3.76065	0.208767	0.249627	0.0321008
TCGA-CV-7263	1.53425	1	0.71079	0.182057	0	1.34959	3.02779	0.0467006	0.820485	0.603692	0	0.567156	1.06681	0.86671	0.778713	1.89782	1.77087	0.483364	4.37687	0.263155	0.637935	0.222805
TCGA-CN-6992	2.92055	0	1.48223	0.239276	1.01142	1.62938	1.27822	1.03626	1.06723	0.846714	1.81918	0.294077	1.02013	0.826437	0.741575	1.86738	1.6859	0.331247	4.49819	1.16871	0.308244	0.431249
TCGA-CV-6939	1.82466	1	0.372952	0.52677	0.869556	1.45223	2.82353	0.188781	0.529771	0.97306	0.0742314	1.99708	1.07649	0.608525	0.720629	1.6025	1.31504	0.446044	4.48156	0.611739	0.470303	0
TCGA-CV-5431	1.43014	1	0.354903	0.615699	0.983678	2.26466	1.68728	0.522257	0.355806	0.701239	0.262553	0.100978	0.491391	0.732399	0.24062	0.647361	0.83875	0.14104	3.65358	0.141825	0.397584	0.0318186
TCGA-QK-A6IJ	1.06027	0	0.0862403	0.243547	0	1.12823	0.75873	0.218347	0.720891	0.680774	0.69332	0.596744	0.648373	1.29872	0.506602	0	0.678703	0.0709388	2.42828	0.92372	0.272143	0
TCGA-QK-AA3K	0.693151	0	0	0.161307	0.289362	2.72148	0.289952	0.943809	1.6854	0.368489	0	0.168129	0.942834	1.70244	0.587557	0.659103	2.13721	0.220825	4.87925	0.526269	0.401084	0.105946
TCGA-UF-A7JV	0.246575	1	0.331934	0.330558	0	0.87208	1.55479	1.18568	0.325156	1.00187	0	0	0.358621	0.545968	0.372395	0.608998	1.53938	0.270708	3.98257	0.110764	0.335255	0.1149
TCGA-UP-A6WW	1.41918	0	0.799419	1.74975	0	2.64178	2.39706	0.133827	1.01585	0.406319	1.279	1.91999	0.382723	1.72067	1.45518	1.07731	1.85858	0.371503	2.9649	0.50782	0.537246	0.14991
TCGA-C9-A47Z	0.523288	1	0.5431	0.139077	0.0992279	0.860129	1.51359	0.590243	0.903655	0.320427	0.149389	0.636636	0.601506	0.624803	0.290542	1.07984	0.773574	0.145351	3.56479	0.104605	0.509747	0.257373
TCGA-CQ-6224	4.71507	0	0.086512	0.0861044	0	0.788519	0.429964	0	0.375623	0.727267	0	0.658463	0.201383	0.197236	0.802235	1.48882	1.68059	0.371169	3.79576	0.260989	0.285343	0.0560285
TCGA-CV-6433	1.75616	0	1.08141	0.587653	0	1.96362	3.62633	0.164658	0.310107	1.94953	0.155879	2.93238	0.917852	0.959918	0.91219	0.332278	3.27742	0.364124	2.81363	0.772815	0.633106	0.0363275
TCGA-CR-6482	0.945205	0	0.498864	0.666847	0.470927	1.09532	2.03386	0.251204	0.313362	0.973134	0.172103	0.796265	0.263395	0.188907	0.656268	1.49631	0.976877	0.471448	3.34126	0.159112	0.365581	0.105142
TCGA-DQ-7588	1.16986	1	0.603312	0.135535	0	1.23223	0.980098	0.70726	0.190678	0.787683	0	0	0.897937	0.233765	0.520447	0	0.594357	0.0600474	4.54599	0.220082	0.0874628	0.0339339
TCGA-CR-6480	0.991781	0	1.10084	0.237319	0	1.19975	3.18153	0.0718999	0.610322	0.525668	0.067914	1.87247	0.834954	0.213752	0.838911	2.30384	1.52667	0.543496	2.81547	0.242328	0.70982	0.090447
TCGA-QK-A6IG	0.608219	1	0	0.0455828	0	1.46383	0.445833	1.13159	0.828063	1.17766	0.428571	0.487692	0.599984	2.07348	0.394514	0.210389	1.29707	0.120352	4.03929	0.415867	0.176706	0.0440443
TCGA-IQ-A61H	3.11781	0	1.0268	0.298189	0.31313	2.14503	0.97944	0.914565	1.10628	1.13711	0.31904	0	0.588037	1.28398	0.563841	1.49861	2.26168	0.414352	3.31739	0.57628	0.385155	0.850879
TCGA-CV-A45Q	14.1151	1	0	0.105678	0	0.742782	0	0.283211	0.331247	0	0.408821	0	0	1.31742	0.200253	0	0.719753	0.0267293	3.13399	0.0792928	0	0
TCGA-D6-6515	1.10411	1	0.371949	0.34301	0	1.01628	1.40735	0.54587	0.421264	0.505891	0	0.385044	0.321466	0.231801	0.51662	1.85886	1.3217	0.116764	3.92232	0.026021	0.416407	0.305212
TCGA-F7-A622	0.983562	1	0.562084	0.283803	0.0781999	1.44387	0.416407	0.383829	0.35682	0.789938	0.636079	0	0.398022	0.770702	0.207893	0.569199	1.51687	0.101785	3.69234	0.451646	0.214871	0.0540844
TCGA-CV-6943	1.64932	1	0.295958	0.446468	0	0.70779	1.01678	0.341986	0.317883	0.531868	0	0.250234	0.364124	0.147958	0.324004	1.87275	1.3184	0.195852	3.31491	0.0941009	0.298893	0.081885
TCGA-CV-7407	2.96164	1	0.327342	0.11703	0.618709	1.6378	0.56267	0.765535	0.378512	0.699107	0.125783	0.261471	0.127765	0.202888	0.344033	0.869714	1.84691	0.156655	3.6811	0.445303	0.188401	0.192573
TCGA-CN-6988	0.871233	0	2.32803	0.537246	0	0.886277	2.13576	0.254836	1.5144	1.68634	0.721241	1.55778	0.867106	1.1432	0.914182	1.76209	0.994218	1.12274	5.0098	0.505383	0.341758	0.539829
TCGA-BA-A6DD	0.473973	1	0	0.117163	0	1.19906	0.441696	0.312317	0.441377	0.604261	0.064331	0.261711	0.638306	0.203138	0.296428	0.786429	1.36899	0.0589399	3.18061	0.249627	0.0754642	0.0578315
TCGA-CV-7415	1.90411	1	0.153676	0.1038	0.505993	1.84225	0.961549	0.905736	0.395611	0.350724	0.0568609	0	1.11902	0.847596	0.286171	1.45122	2.89319	0.287827	3.51024	0.0588014	0.350158	0.148088
TCGA-CN-5366	0.986301	1	0	0.108357	0	1.73387	0.731444	0.329066	0.430392	0.517528	0.224287	0.983897	0.702126	0	0.385044	0.653152	1.46394	0.170053	5.01259	0.120352	0.708231	0.225892
TCGA-CV-7101	0.438356	1	0.411643	0.307312	0.0723116	1.49835	1.28859	0.10165	0.220949	0.489646	0.055751	0.297368	0.457962	0.476537	0.237564	1.432	1.50075	0.319271	3.57363	0.251204	0.115699	0.578987
TCGA-CQ-6225	1.10411	1	1.4401	0.169155	1.07094	2.95615	2.23597	0.981341	0.703189	1.12413	0.54587	1.32406	0.788352	1.26099	0.639232	1.20452	1.37334	0.493237	4.04141	0.624803	0.345623	0.310573
TCGA-BA-5558	5.46575	0	0.636729	0.0578315	0.299127	0.547647	0.943884	0.382723	0.289834	0.264476	0.0622599	0.0896337	0	0.524565	0.239398	1.32308	0.616358	0.0071955	4.16671	0.0852887	0.195977	0.0282862
TCGA-CV-5971	1.92055	0	0	0.514299	0	1.86655	0.380951	0.0856966	0.611928	0.610228	0	0.588133	0.746743	0	0.523462	1.41116	1.55739	0.607674	4.25139	0.0563061	0.45586	0.229342
TCGA-BA-A6DJ	1.11507	1	0.08882	0.171847	0	1.23842	0.874128	0.392977	0.426426	0.390668	0.348006	0	0.281787	0.680324	0.271067	0.600175	0.815985	0.215616	3.31781	0.1503	0.342213	0.0855606
TCGA-CV-7095	1.56712	1	0.4959	0.18409	0.385928	2.47628	0.942608	0.128689	0.167872	0.416516	0	0.328836	0.354452	0	0.565987	1.22188	0.891264	0.23217	3.68053	0.057277	0.115033	0.0739573
TCGA-D6-6824	0.210959	0	0.347325	0.581978	0.172744	1.6035	1.18561	0.0901759	0.529571	0.353549	0.068602	0.191057	0.611739	0.569588	0.413702	1.869	1.40299	0.633664	4.04126	0.505891	0.632734	0.0913952
TCGA-CN-6010	4.1726	0	1.03259	0.454386	0.176706	1.31725	1.56496	0.0560285	0.911193	0.70115	0.377846	0.592254	0.910042	0.869082	0.824727	2.09889	2.68367	0.75745	4.11902	0.584193	0.645241	0.680954
TCGA-P3-A5Q5	2.49315	0	1.13396	0.346305	0	0.621243	1.33971	0.192825	0.456175	1.15788	1.26003	1.53426	0.279055	1.69435	0.363339	0.385597	1.14581	0.121015	3.1069	0.489132	0.409798	0.164658
TCGA-D6-A6EK	2.39726	0	0	0.0607392	0	0.570366	0.313246	0.102457	0.233029	0.212258	0.0652966	0	0.286645	0.386259	0.224658	0.144307	0.331591	0.0302654	2.83327	0.110898	0.0311128	0
TCGA-BA-A4IG	2.34247	0	0.950319	0.207518	0	1.93599	4.0881	0.0825664	0.49057	1.40507	1.00065	1.80941	1.09112	0.796515	0.463832	1.46817	1.77766	0.164529	3.71565	0.106616	0.737946	0.320773
TCGA-CR-7368	3.41096	0	2.08038	0.414244	0.832201	1.13192	3.12386	0.640899	1.00741	0.710261	0.213378	0.856548	0.49057	0.944184	0.367147	2.02673	1.19137	0.258217	4.22625	0.114367	0.838508	0.0751903
TCGA-P3-A6SW	3.06849	0	1.12373	0.421371	0.102322	0.880568	1.30585	0.441058	0.662844	1.06378	0.88276	1.64418	0.0539454	2.18314	0.268554	0.467801	1.48285	0.166458	3.69397	0.473112	0.638213	0.105142
TCGA-BA-6873	0.334247	0	0.330214	0.0603241	0	1.1624	0	0.851439	0.660016	1.36401	0	0.181039	0.642748	0.686881	0.702746	0.876173	1.32826	0.237441	4.56031	0.28948	0.38228	0.114234
TCGA-CQ-A4C9	1.93699	0	1.12181	0.4755	0	1.60075	2.64466	0.349818	0.965249	2.00971	0.829525	0	0.38648	0.716859	0.843823	1.61231	1.43563	0.171079	3.85653	0.316957	0.817541	0.041243
TCGA-CN-6011	2.55616	0	1.35935	0.052555	0.702303	0.877901	1.72434	0.710173	1.3553	0.542308	0.214249	0	0.283329	0.339365	0.447738	0.787934	1.68109	0.16221	4.08974	0.254957	0.763327	0
TCGA-CQ-5325	1.79178	1	0.258217	0.17645	0.242694	0.394624	0.243182	0.152508	0.198368	0.214125	0	0.140124	0.464982	0.301471	0.364012	1.28268	1.24434	0.184471	3.29375	0.0681893	0.41186	0.044604
TCGA-CN-A49C	1.76712	0	1.25755	0	0.184978	1.71	2.31516	0.169797	0.928124	1.01114	0.505078	1.81258	0.712904	0.760774	0.514703	0.673104	1.51111	0.430392	3.115	1.08447	0.480058	0.0661236
TCGA-DQ-7591	1.70411	0	1.15685	1.13442	0.798092	2.0027	2.3542	0.359521	1.11849	1.68796	1.46483	1.29965	0.855511	1.80707	0.893207	1.77627	1.15497	0.340277	4.52136	1.08929	0.972472	0.153935
TCGA-BA-A6DE	1.20548	0	1.35135	0.939603	0.395282	2.2921	1.25695	0.86259	0.697952	1.37651	0.133037	0	0.782241	0.847837	0.651316	1.77003	1.12532	0.313826	4.08538	0.159112	0.853756	0.256528
TCGA-CV-6937	1.70959	1	0.373286	0.0912598	0.870187	2.01956	0.942533	0.804384	1.71796	0.111432	0.276675	0	0.894837	1.83495	0.59684	1.3779	2.41175	0.513086	3.02639	0.256286	0.776862	0.211261
TCGA-CN-5369	0.00273973	1	0.282736	0.193709	0.265797	1.25683	1.21276	0.496002	0.541812	0.339137	0.158596	0	0.395063	0.469886	0.416299	0.975924	0.870187	0.229957	4.15847	0.128953	0.458277	0.0247452
TCGA-CN-6024	0.923288	1	0.396708	0.0738202	0.10286	1.71638	1.02687	0.31034	0.607484	1.02375	0.226385	0.497229	0.852718	0.248049	0.207268	1.41733	2.94847	0.309991	4.66734	0.554736	0.214125	0.438293
TCGA-CV-6934	0.178082	1	0.0727232	0.249627	0.133169	1.55469	1.11303	0.613154	0.484808	0.464668	0.103128	0.810155	0.562474	0.452174	0.436695	0.944484	2.03058	0.311968	4.07565	0.123534	0.364909	0.0471195
TCGA-F7-8298	2.72603	0	0	0.767655	0	0.772055	1.16279	0.983969	0.369383	0.898092	0.360645	0	0.715103	1.36087	0.472384	0.717737	2.10906	0.119821	4.2275	0.297015	0.813935	0.059909
TCGA-BA-5152	3.52877	0	0.0571383	0.129349	0.0533894	0.864255	0.682304	0.156655	0.123004	0.892352	0	0.704518	0.134747	0.252658	0.532467	0.783331	0.901417	0.118891	3.99235	0.083792	0.267835	0.0549179
TCGA-CR-7377	0.764384	1	0.250355	0.299479	0.373175	0.856946	0.670568	0.36446	0.188274	0.599889	0	0	0.205643	0	0.219587	0.780982	1.73344	0.494262	3.8111	0.169668	0.173511	0.057277
TCGA-CV-A460	5.03562	1	1.01099	0.65104	0.595408	1.00202	1.74006	0.670931	0.508733	0.327572	0.22367	0.572793	0.250234	1.07799	0.753605	0.816477	1.58904	0.276199	4.66548	0.132774	0.39605	0
TCGA-CX-7082	0.030137	1	1.31121	0.417164	0.862432	2.62945	1.53207	0.50711	1.1865	0.867343	0.311503	0.824075	0.543199	1.28517	0.502127	1.56993	2.30056	0.487898	4.60533	0.534958	0.198494	0.450908
TCGA-CN-A63U	2.6411	0	1.7956	0.748204	0	1.60412	0.842858	0.77349	0.566961	2.1562	0.77197	0.19774	0.630405	1.81217	0.869556	0.156655	0.267236	0.559737	3.73765	1.62863	0	0.0322419
TCGA-KU-A66T	1.51233	0	1.18669	0.290424	0.323197	2.44792	1.39819	0.889941	0.475707	1.31034	0.742524	0	0.859572	0.845109	0.285225	0.408494	1.28078	0.143393	4.52269	0.261832	0.481506	0.0903115
TCGA-CV-7252	0.413699	1	0.0959919	0	0.0899049	0.599699	1.4878	0.0553345	0.397693	0.535257	0.0694272	0.363227	0.519944	0	0.441696	0.833821	1.33668	0.473735	4.55942	0.0482362	0.287354	0.0924781
TCGA-QK-A8ZA	1.01644	1	1.92532	0.309991	0.66948	2.78484	1.75146	1.29531	0.455229	0.796265	0.403813	0	0.649937	0.279768	0.338339	1.3856	2.33411	0.406101	4.56779	0.181039	0.712728	0.945383
TCGA-HD-A4C1	0.030137	0	0.808673	0	0	0.914258	1.5709	0.56988	0.50019	0.515309	0.147437	0	0.906737	1.04914	0.227987	1.62077	0.900336	0.485324	4.02189	0.152248	0.424385	0.254231
TCGA-CN-6994	3.2411	0	1.05005	0.215989	0.62826	2.30958	1.29772	1.01057	1.63134	0.308361	0.188148	0	0.510759	0.759071	0.396927	1.81942	1.58823	0.183201	4.26562	0.100439	0.837863	0.0873271
TCGA-CR-6473	3.08219	0	1.44922	0.399554	0	2.41162	1.88803	0.72779	0.17031	0.210264	0.498659	1.99996	0.355918	1.60966	0.42664	2.94768	0.40021	0.351063	4.76175	0.583519	0.906891	0.167615
TCGA-CV-7255	0.175342	1	0.96997	0	0.066537	1.12955	0.462681	0.722903	0.158854	0.656725	0.0511633	0.451435	0.315798	0	0.512884	1.64672	1.23499	0.184344	4.7654	0.104068	0.594835	0.0683269

## Sheet: Table S6
id	coef
ECE1-AS1	-1.09085
AL358777.3	-0.758273
AL033527.2	-0.742931
AL162458.1	-0.54706
AC090587.1	-0.490221
CDKN2A-DT	-0.354004
SNHG16	0.283875
AC012184.3	0.493589
LINC01012	0.63435
AC243965.2	0.75713
AP000866.1	1.45206
